# Supplementary material for: Cytotoxic Thiodiketopiperazine Derivatives from the Deep Sea-Derived Fungus Epicoccum nigrum SD-388
Source: Mar Drugs. 2020 Mar 13;18(3):160. doi: 10.3390/md18030160 (PMC7143119; doi:10.3390/md18030160)

# Supplementary Material

## Antitumor thiodiketopiperazine derivatives from the deep sea-derived fungus *Epicoccum nigrum* SD-388

Lu-Ping Chi <sup>1,2,3</sup>, Xiao-Ming Li <sup>1,2</sup>, Li Li <sup>1,2,3</sup>, Xin Li <sup>1,2,\*</sup> and Bin-Gui Wang <sup>1,2,4,\*</sup>

### Content

Figure S1. <sup>1</sup>H NMR (500 MHz, DMSO-*d*<sub>6</sub>) spectrum of compound **1**;

Figure S2. <sup>13</sup>C NMR (125 MHz, DMSO-*d*<sub>6</sub>) and DEPT spectra of compound **1**;

Figure S3. COSY spectrum of compound **1**;

Figure S4. HMBC spectrum of compound **1**;

Figure S5. NOESY spectrum of compound **1**;

Figure S6. HR-ESI-MS spectrum of compound **1**;

Figure S7. Crystal packing of compound **1** at 293(2) K;

Figure S8. <sup>1</sup>H NMR (500 MHz, DMSO-*d*<sub>6</sub>) spectrum of compound **2**;

Figure S9. <sup>13</sup>C NMR (125 MHz, DMSO-*d*<sub>6</sub>) and DEPT spectra of compound **2**;

Figure S10. COSY spectrum of compound **2**;

Figure S11. HSQC spectrum of compound **2**;

Figure S12. HMBC spectrum of compound **2**;

Figure S13. NOESY spectrum of compound **2**;

Figure S14. HR-ESI-MS spectrum of compound **2**;

Figure S15. Crystal packing of compound **2** at 293(2) K;

Figure S16.  $^1\text{H}$  NMR (500 MHz,  $\text{DMSO-}d_6$ ) spectrum of compound **3**;

Figure S17.  $^{13}\text{C}$  NMR (125 MHz,  $\text{DMSO-}d_6$ ) and DEPT spectra of compound **3**;

Figure S18. COSY spectrum of compound **3**;

Figure S19. HMBC spectrum of compound **3**;

Figure S20. NOESY spectrum of compound **3**;

Figure S21. HR-ESI-MS spectrum of compound **3**;

Figure S22. Crystal packing of compound **3** at 293(2) K;

Figure S23.  $^1\text{H}$  NMR (500 MHz,  $\text{DMSO-}d_6$ ) spectrum of compound **4**;

Figure S24.  $^{13}\text{C}$  NMR (125 MHz,  $\text{DMSO-}d_6$ ) and DEPT spectra of compound **4**;

Figure S25. COSY spectrum of compound **4**;

Figure S26. HSQC spectrum of compound **4**;

Figure S27. HMBC spectrum of compound **4**;

Figure S28. NOESY spectrum of compound **4**;

Figure S29. HR-ESI-MS spectrum of compound **4**;

Figure S30. ECD spectrum of compound **4**;

Figure S31.  $^1\text{H}$  NMR (500 MHz,  $\text{DMSO-}d_6$ ) spectrum of compound **5**;

Figure S32.  $^{13}\text{C}$  NMR (125 MHz,  $\text{DMSO-}d_6$ ) and DEPT spectra of compound **5**;

Figure S33. COSY spectrum of compound ( $\pm$ )-**5**;

Figure S34. HMBC spectrum of compound ( $\pm$ )-**5**;

Figure S35. HR-ESI-MS spectrum of compound ( $\pm$ )-5;

Figure S36. ECD spectrum of compound ( $\pm$ )-5;

Figure S37. Chiral HPLC profile of compound ( $\pm$ )-5;

Figure S38. ECD spectrum of compound (+)-5;

Figure S39. ECD spectrum of compound (–)-5.

Figure S1.  $^1\text{H}$  NMR (500 MHz,  $\text{DMSO}-d_6$ ) spectrum of compound **1**.

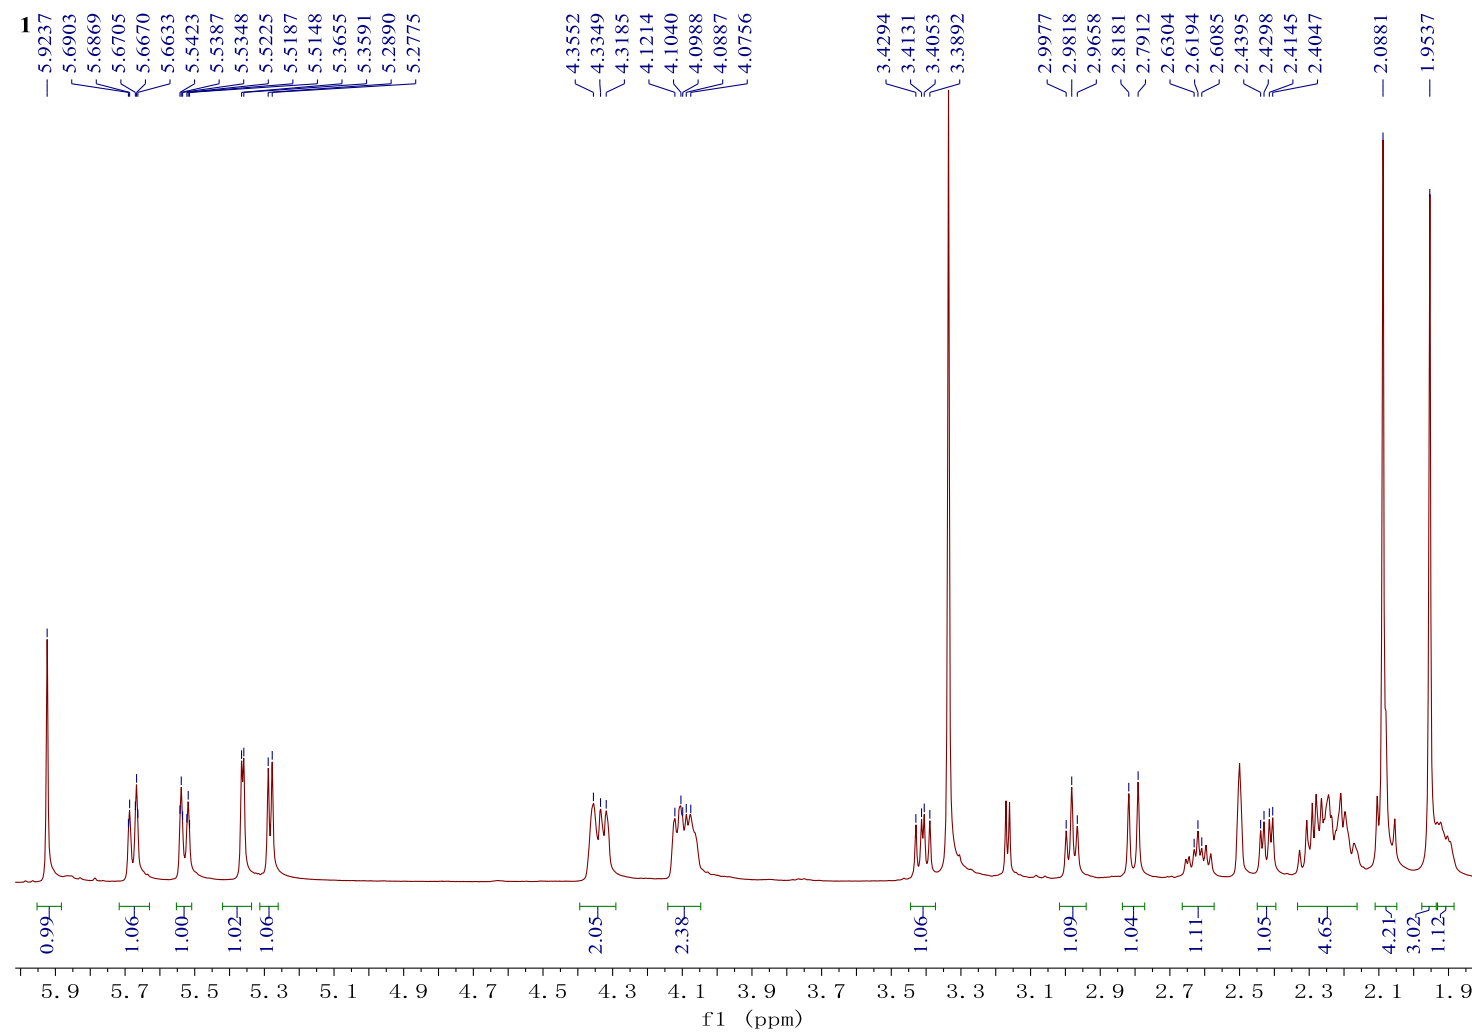

Figure S2.  $^{13}\text{C}$  NMR and DEPT (125 MHz,  $\text{DMSO}-d_6$ ) spectrum of compound **1**.

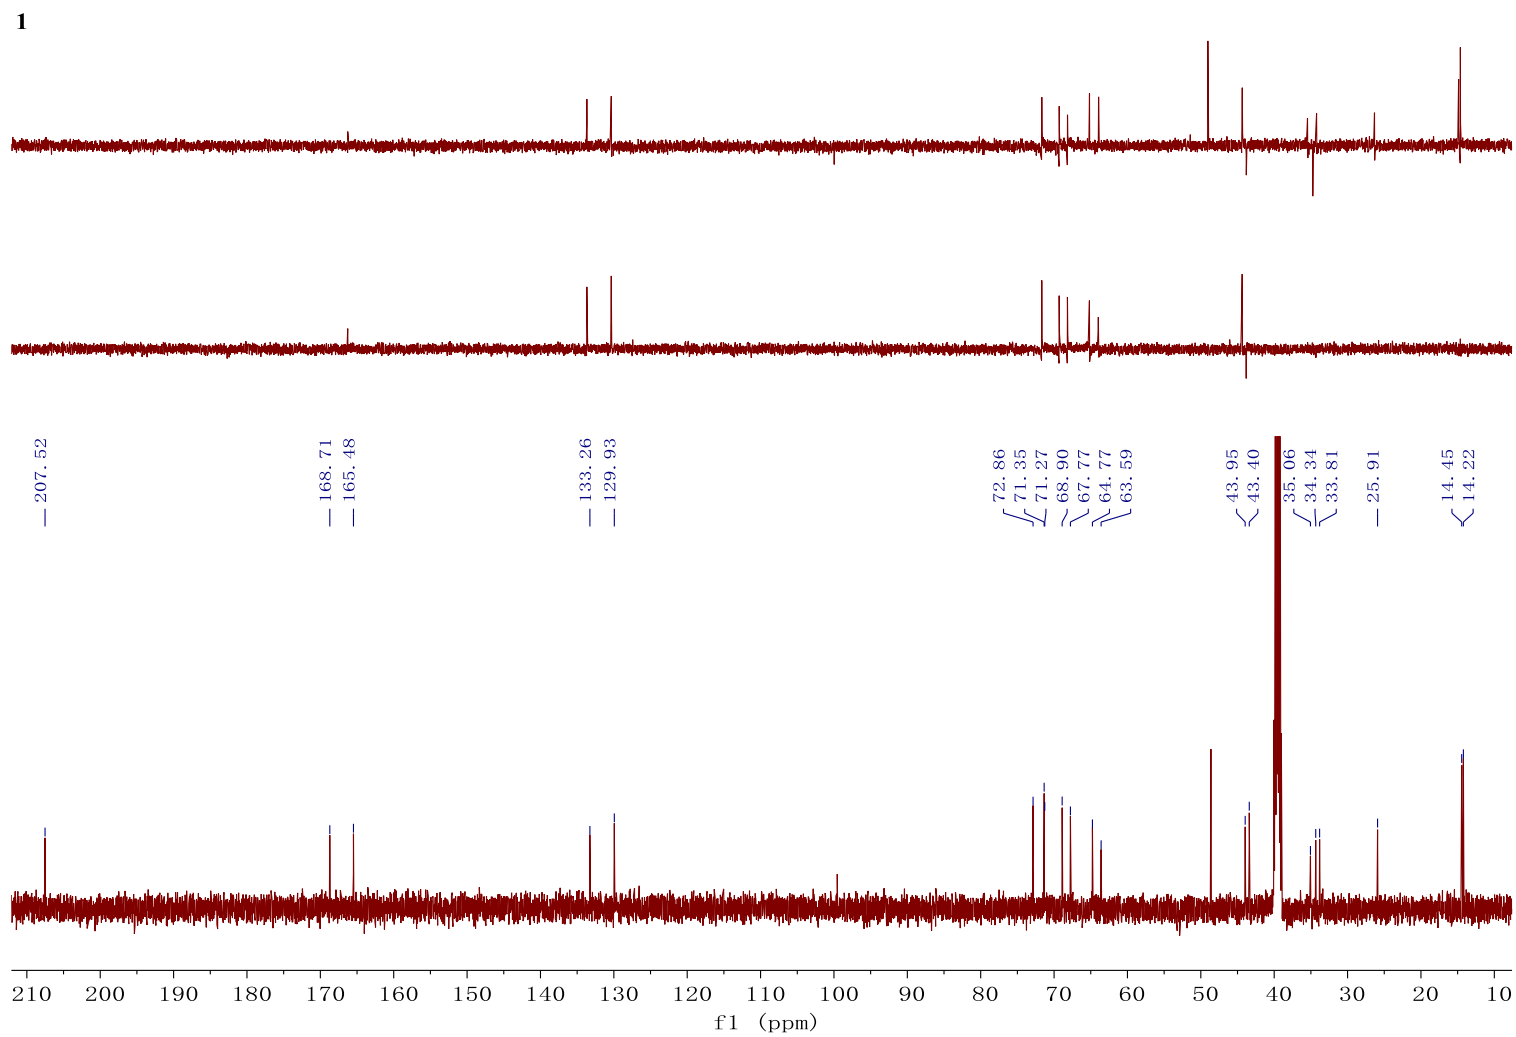

Figure S3. COSY spectrum of compound 1.

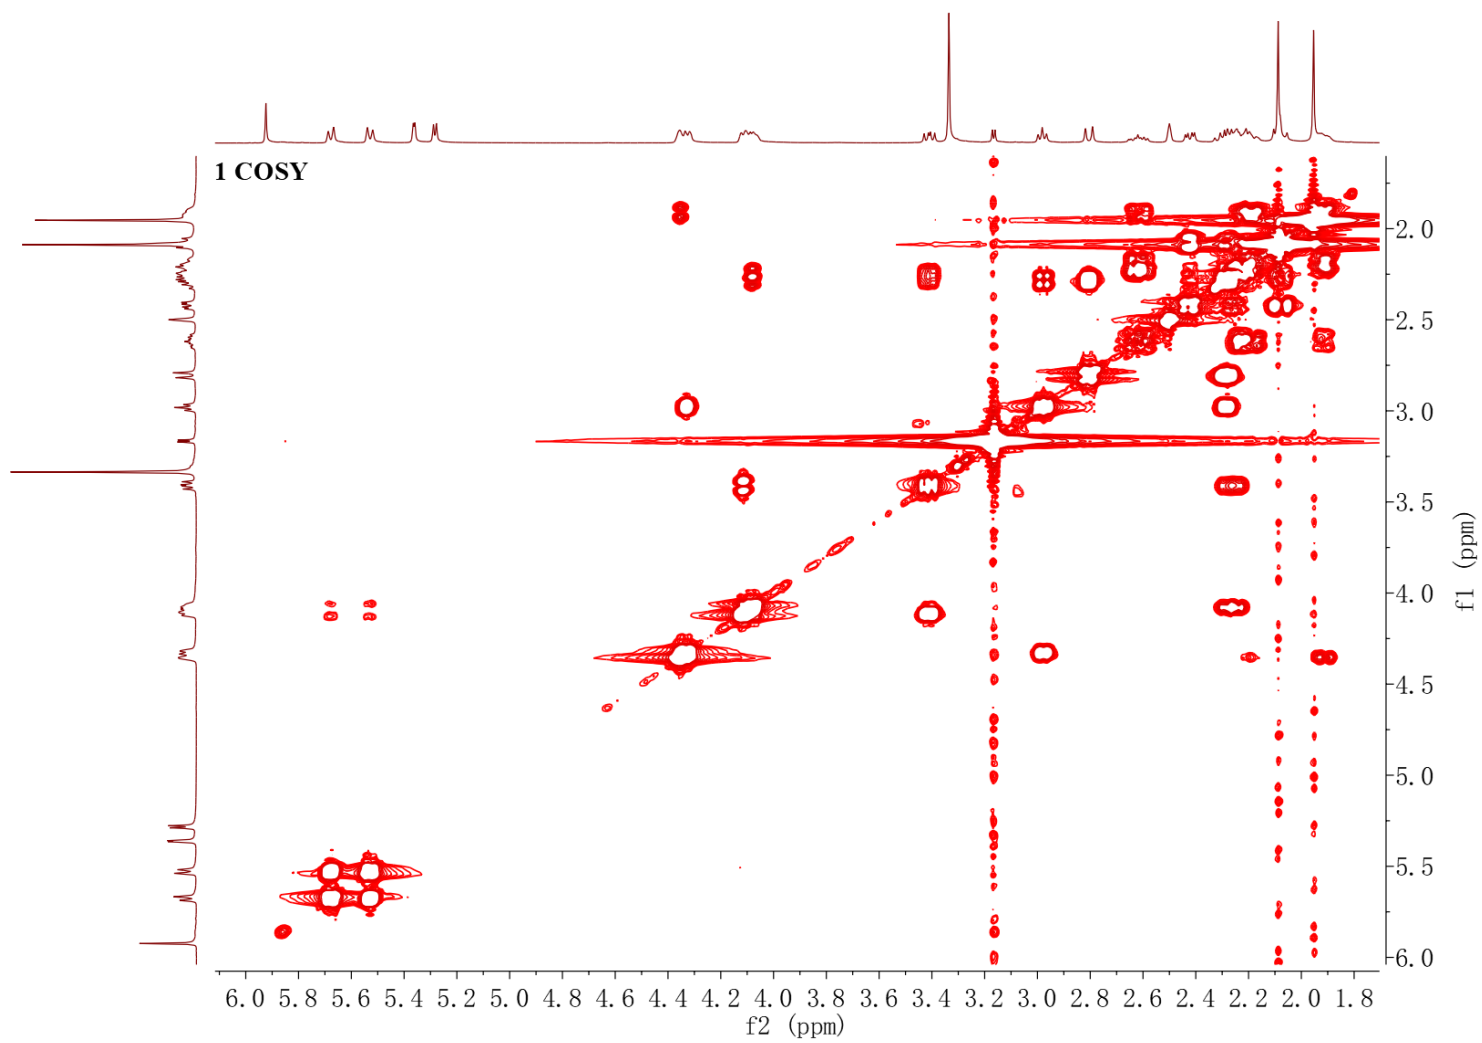

Figure S4. HMBC spectrum of compound **1**.

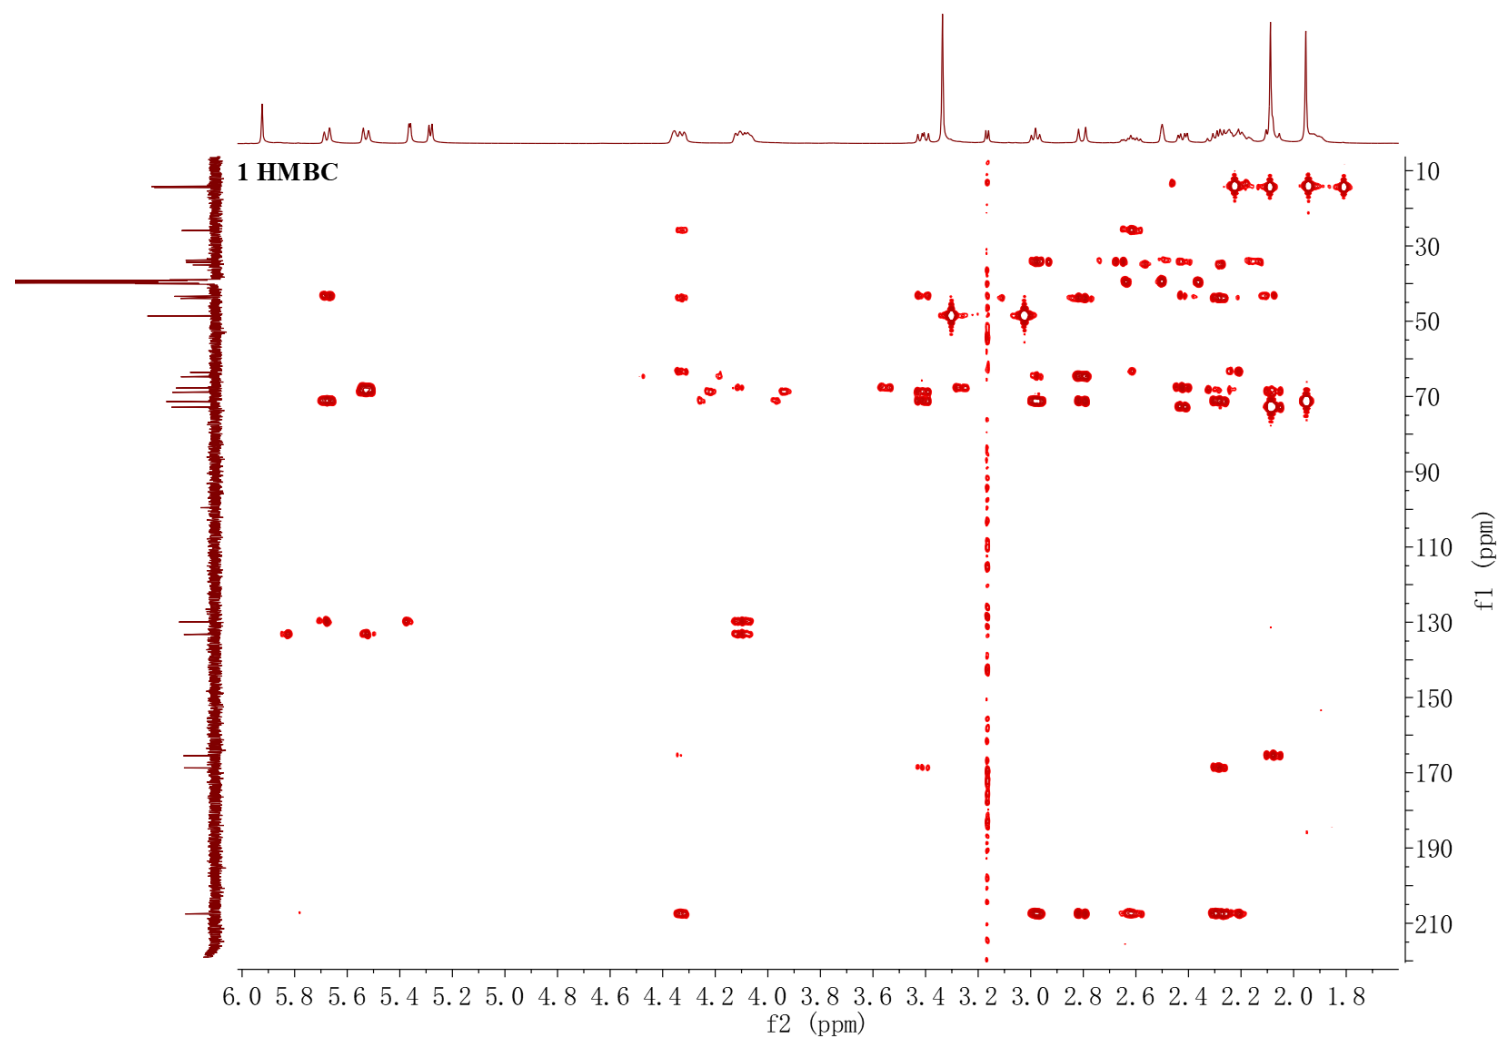

Figure S5. NOESY spectrum of compound 1.

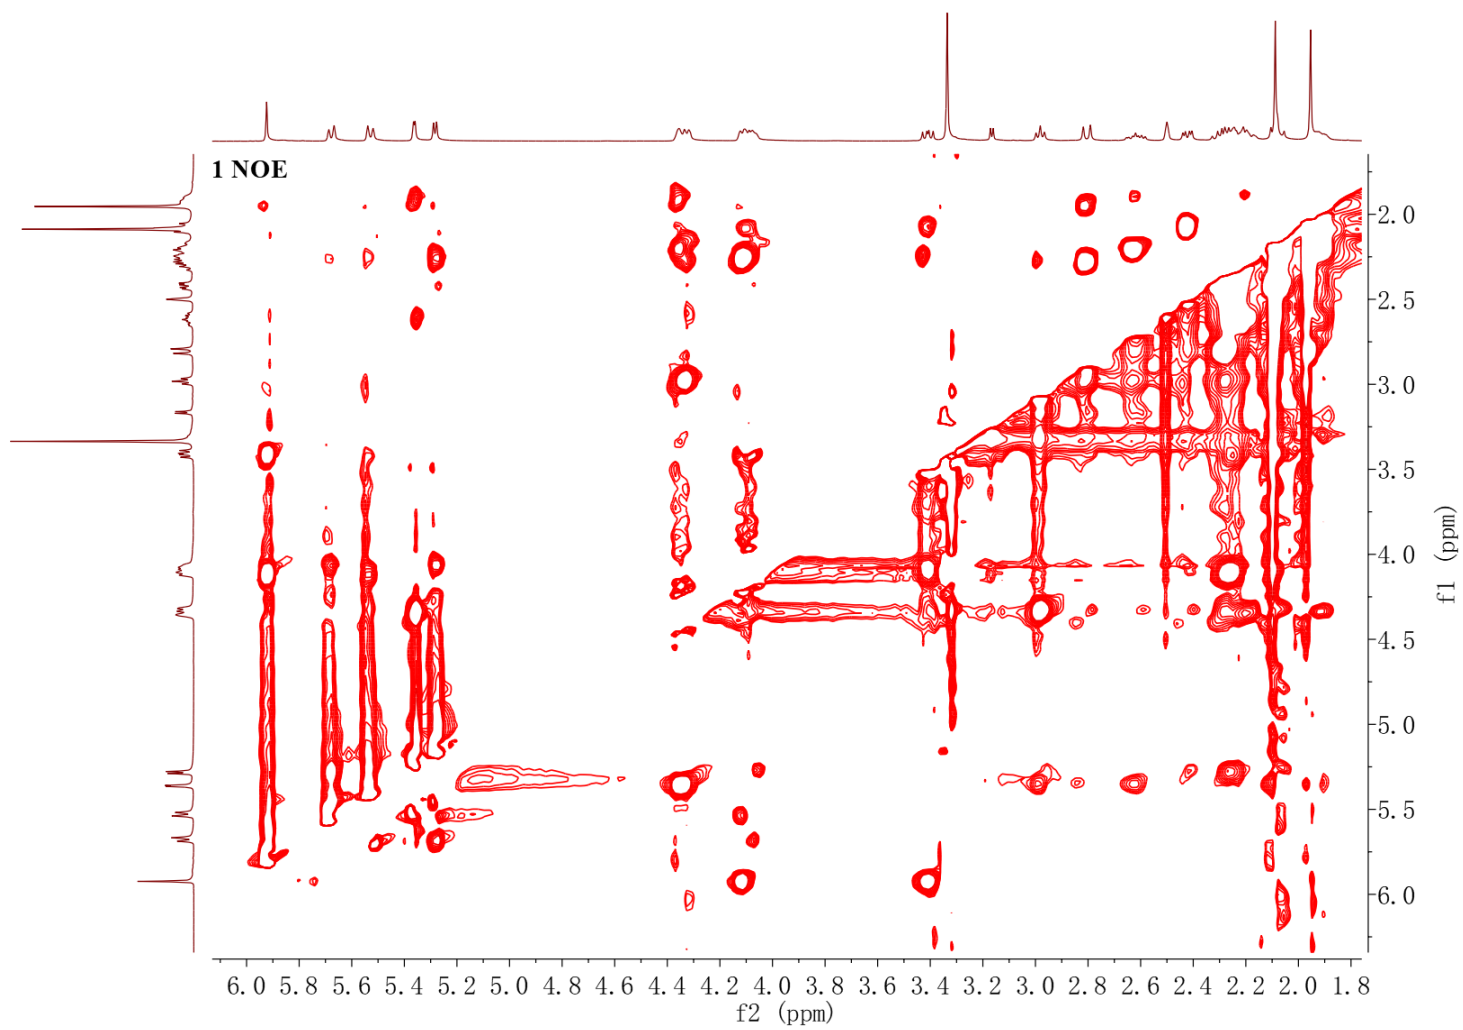

Figure S6. HR-ESI-MS of compound 1.

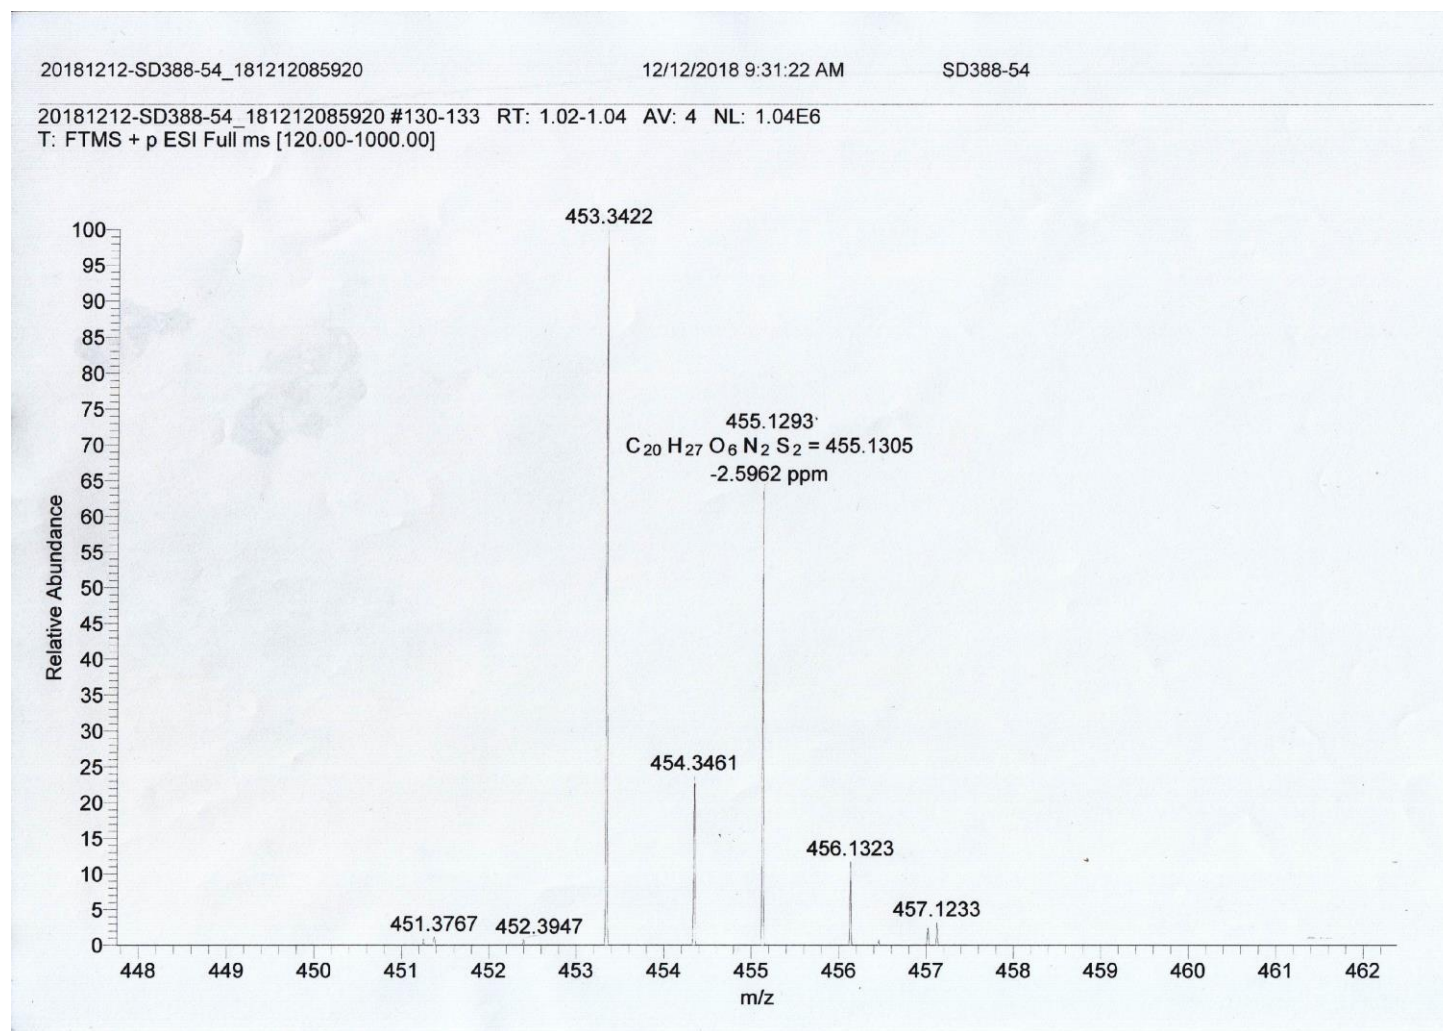

Figure S7. Crystal packing of compound **1** at 293(2) K;

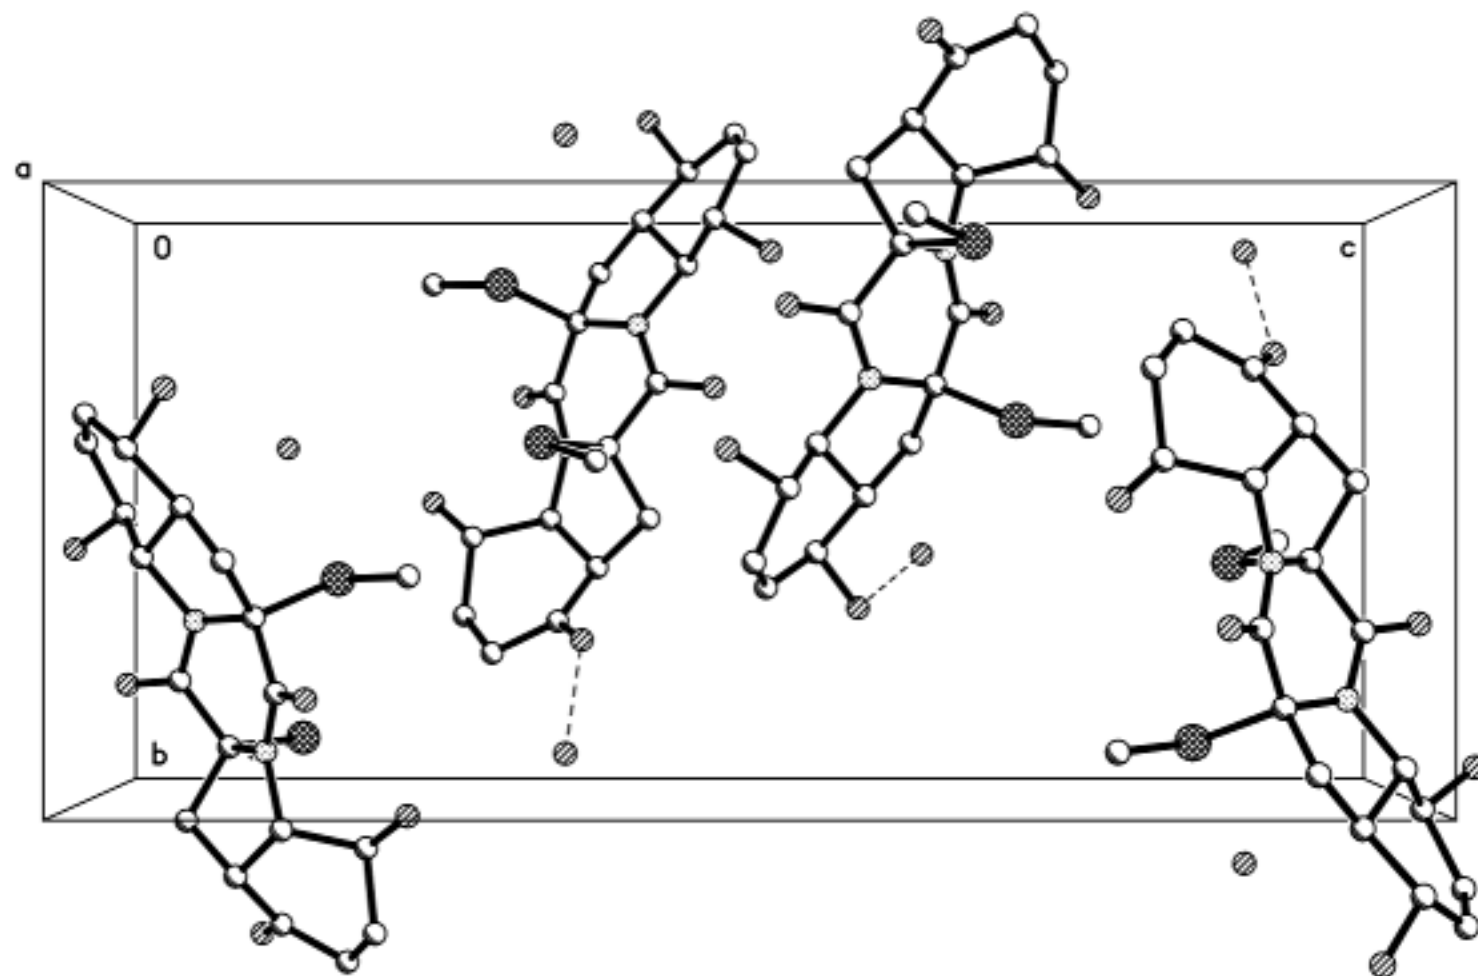

Figure S8.  $^1\text{H}$  NMR (500 MHz,  $\text{DMSO}-d_6$ ) spectrum of compound **2**.

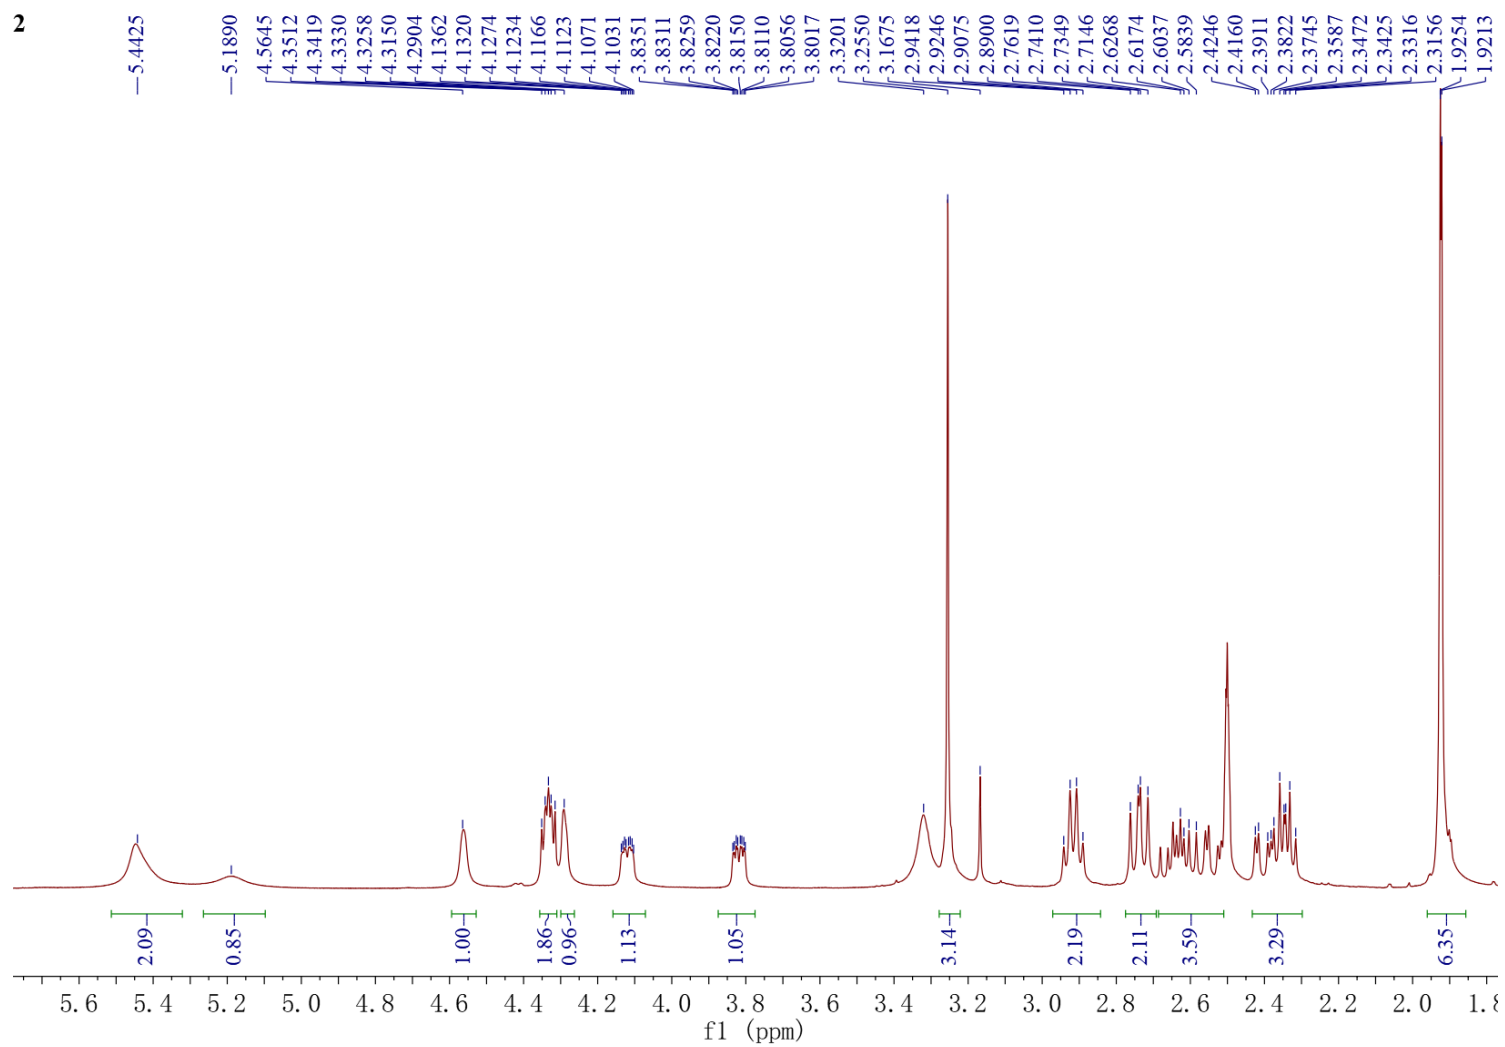

Figure S9.  $^{13}\text{C}$  NMR and DEPT (125 MHz,  $\text{DMSO}-d_6$ ) spectrum of compound **2**.

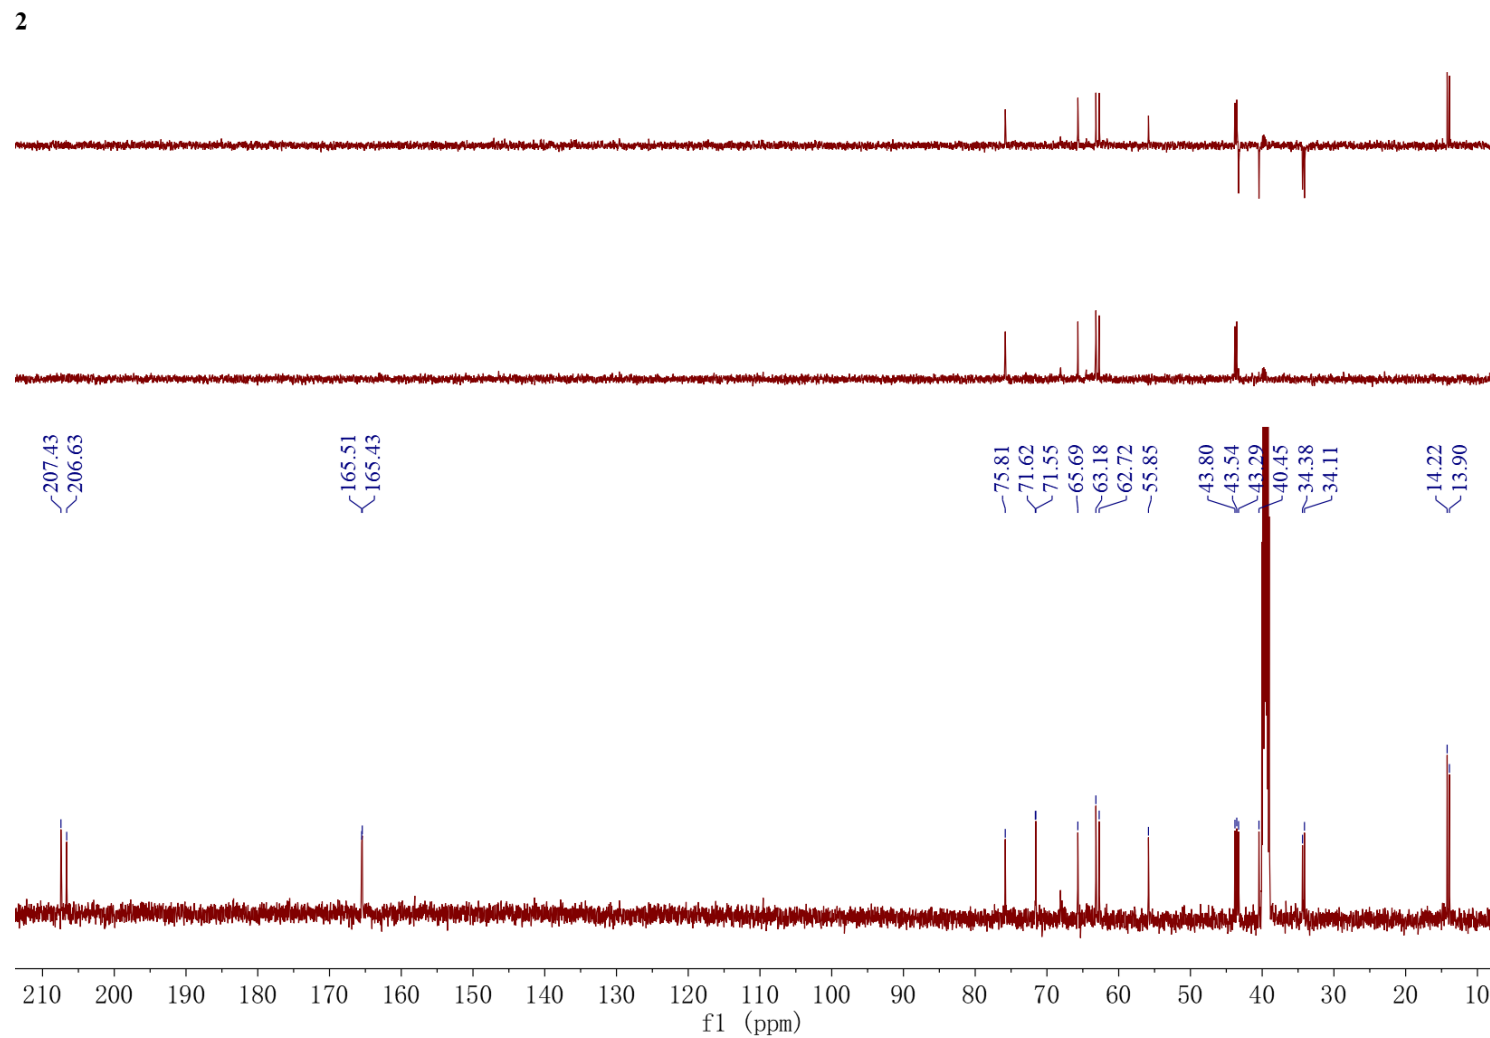

Figure S10. COSY spectrum of compound 2.

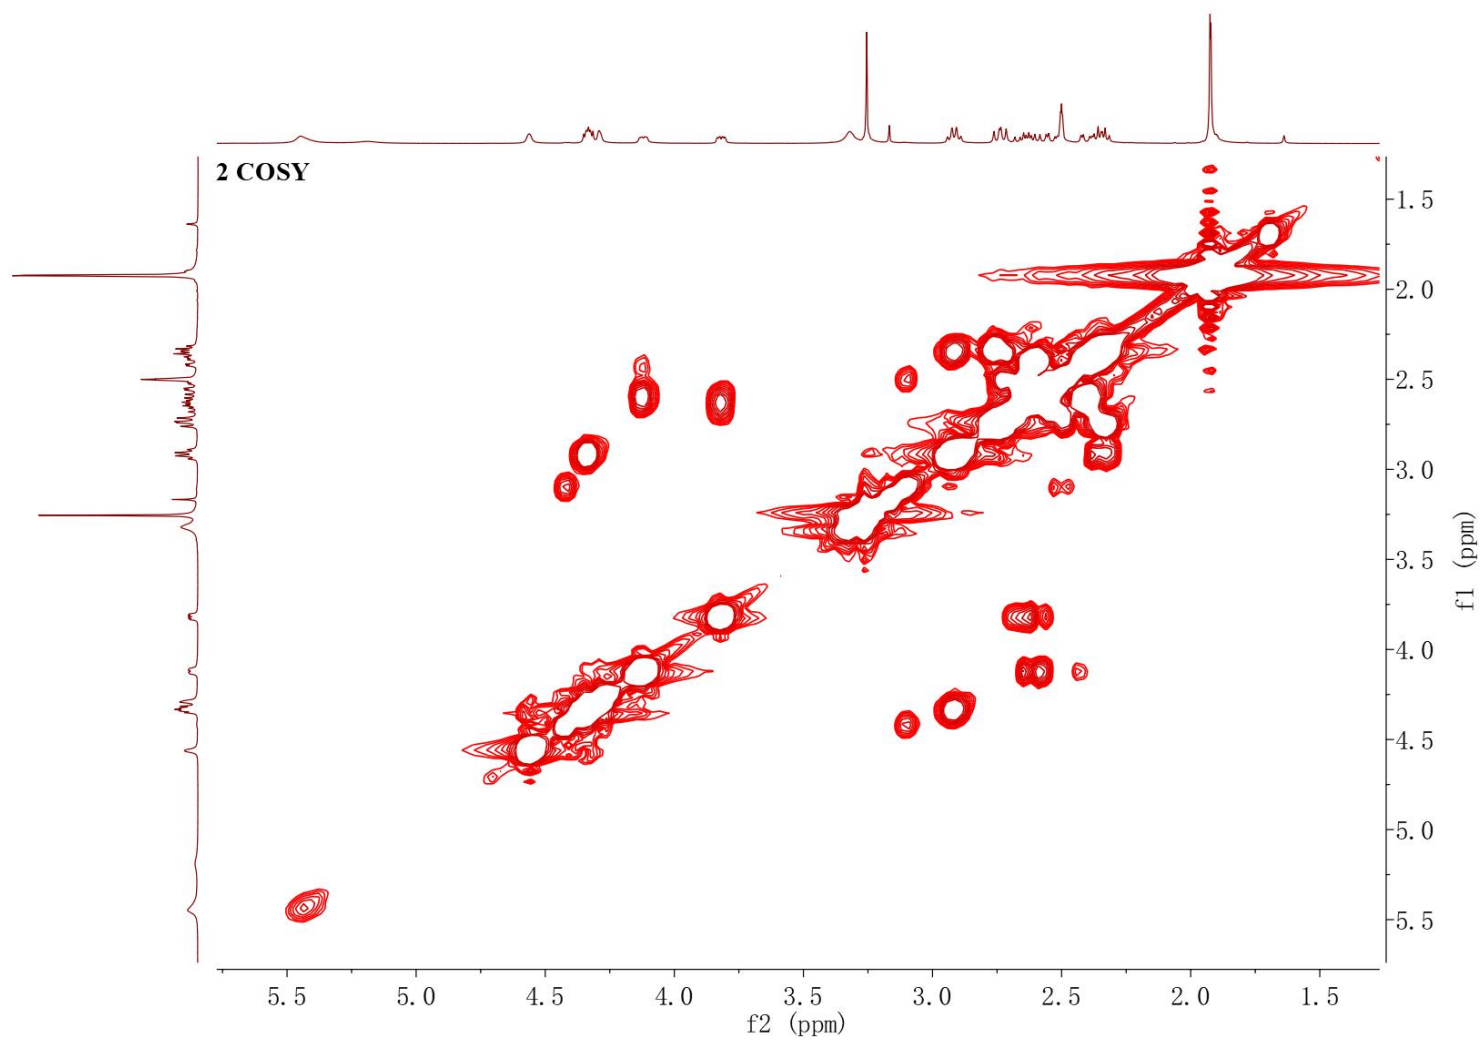

Figure S11. HSQC spectrum of compound 2.

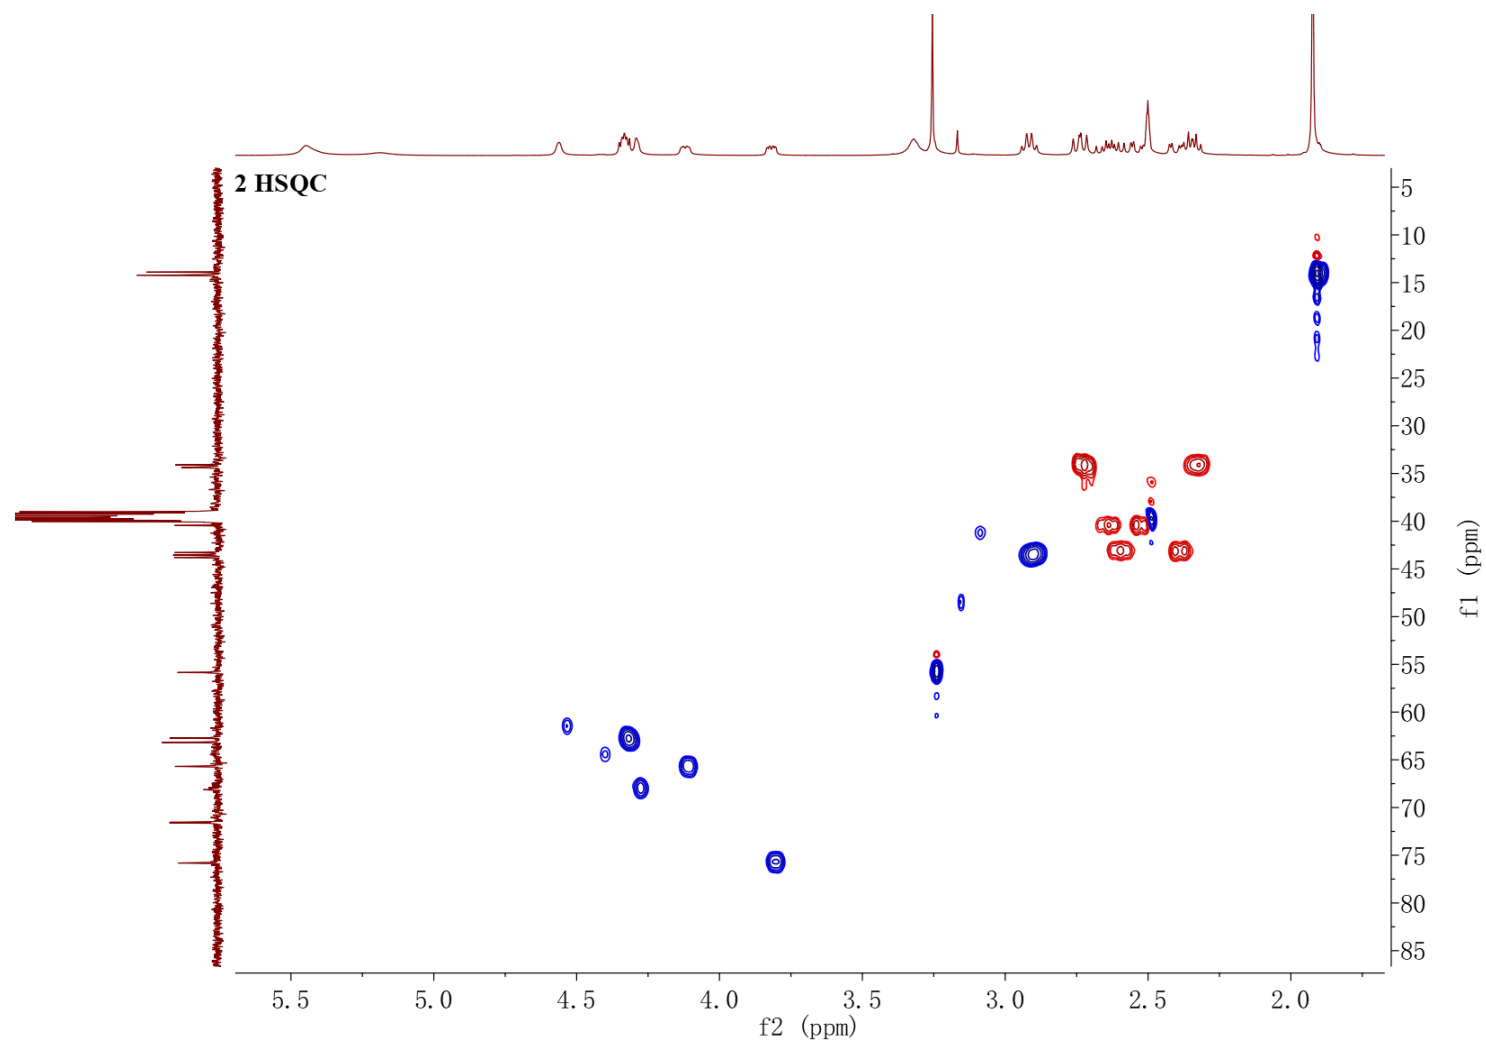

Figure S12. HMBC spectrum of compound **2**.

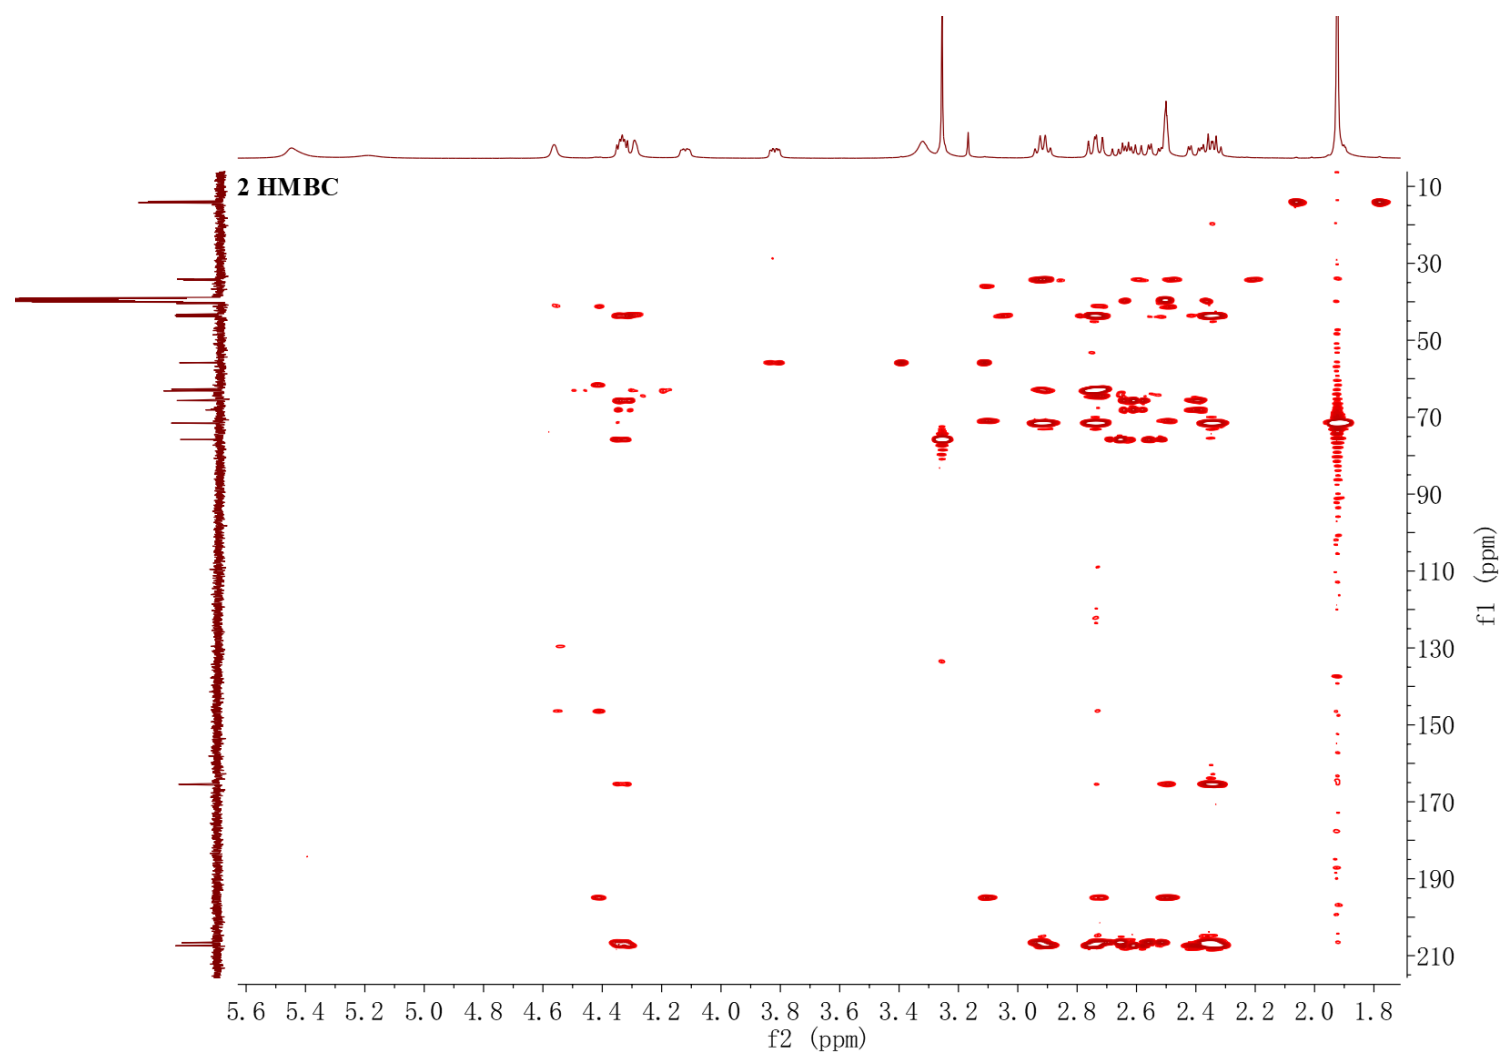

Figure S13. NOESY spectrum of compound 2.

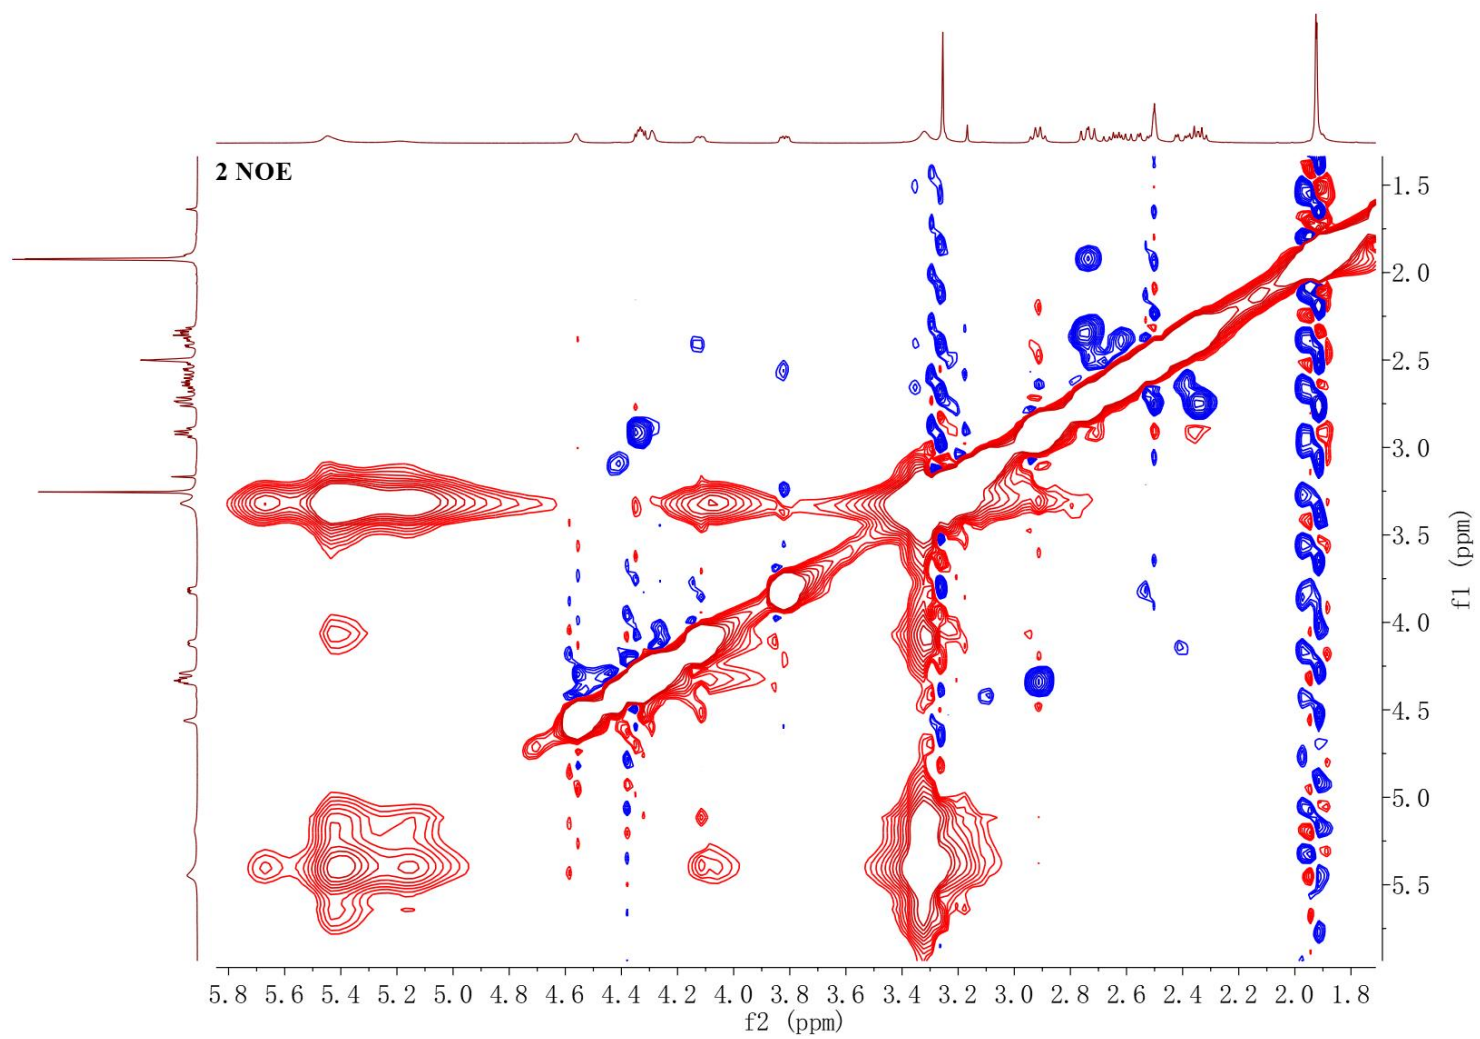

Figure S14. HR-ESI-MS of compound 2.

20190417-SD388-58\_190404155858

4/17/2019 2:22:38 PM

SD388-58

20190417-SD388-58\_190404155858 #54 RT: 0.43 AV: 1 NL: 9.94E6  
T: FTMS + p ESI Full ms [100.00-1000.00]

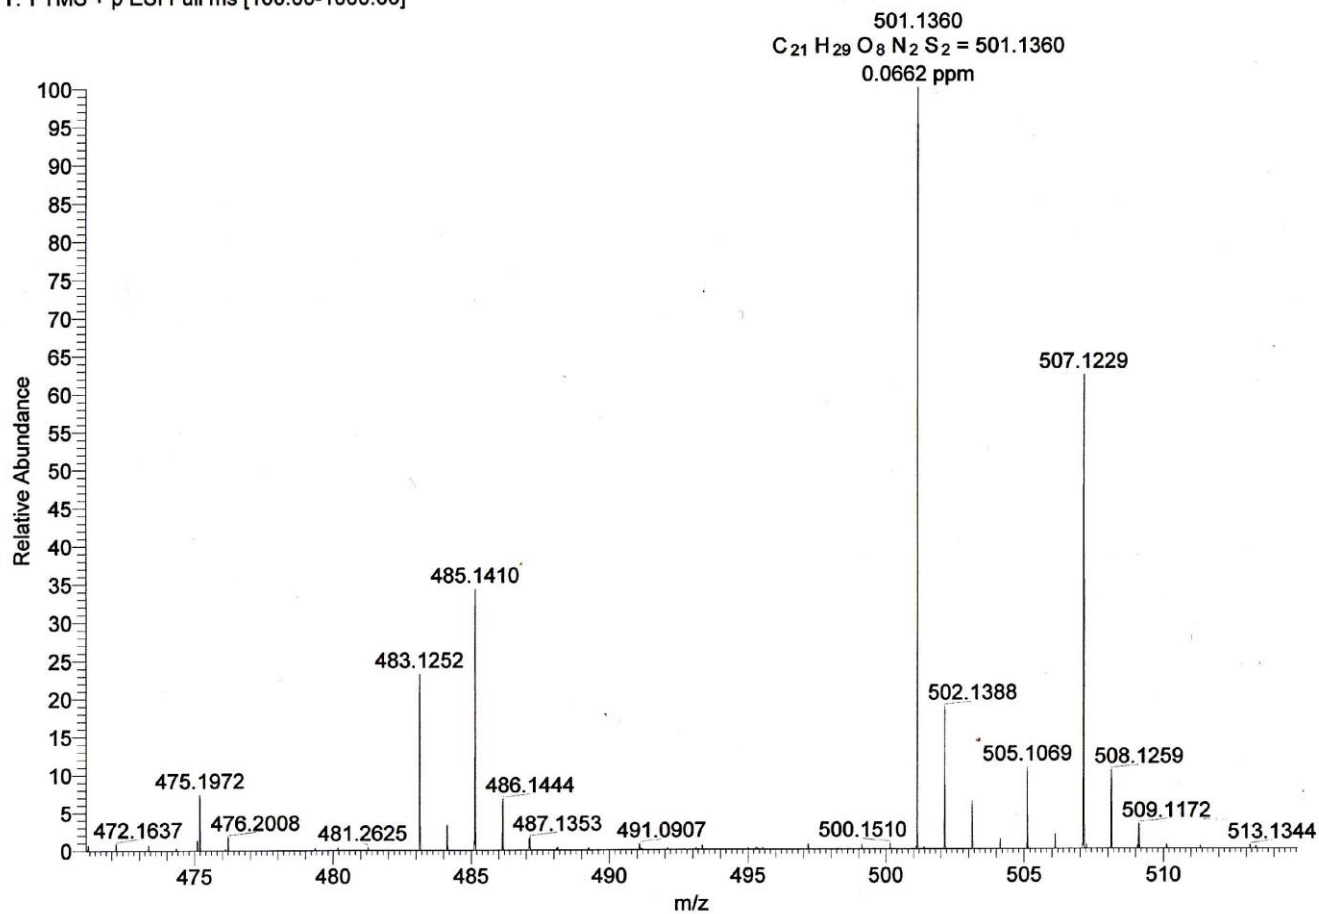

Figure S15. Crystal packing of compound **2** at 293(2) K;

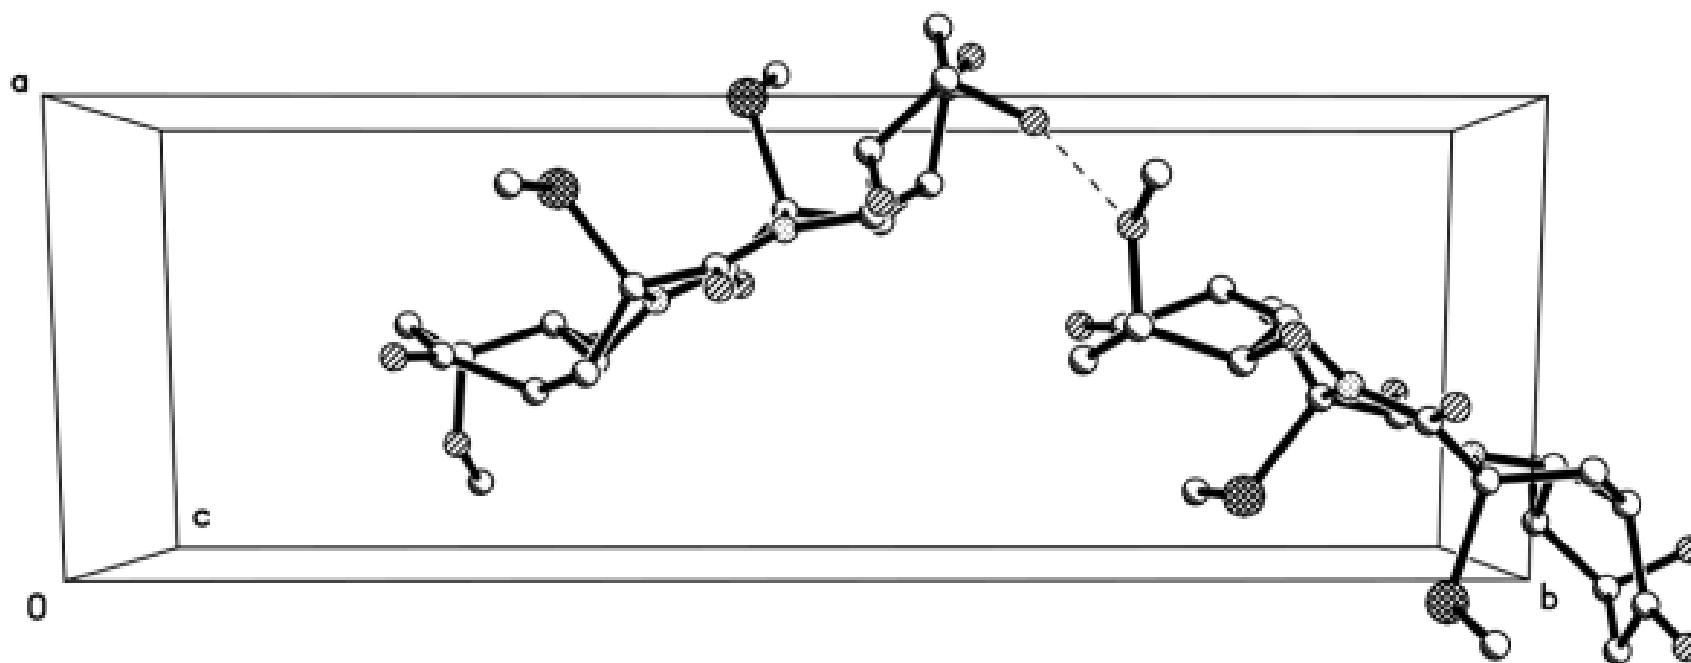

Figure S16.  $^1\text{H}$  NMR (500 MHz,  $\text{DMSO}-d_6$ ) spectrum of compound **3**.

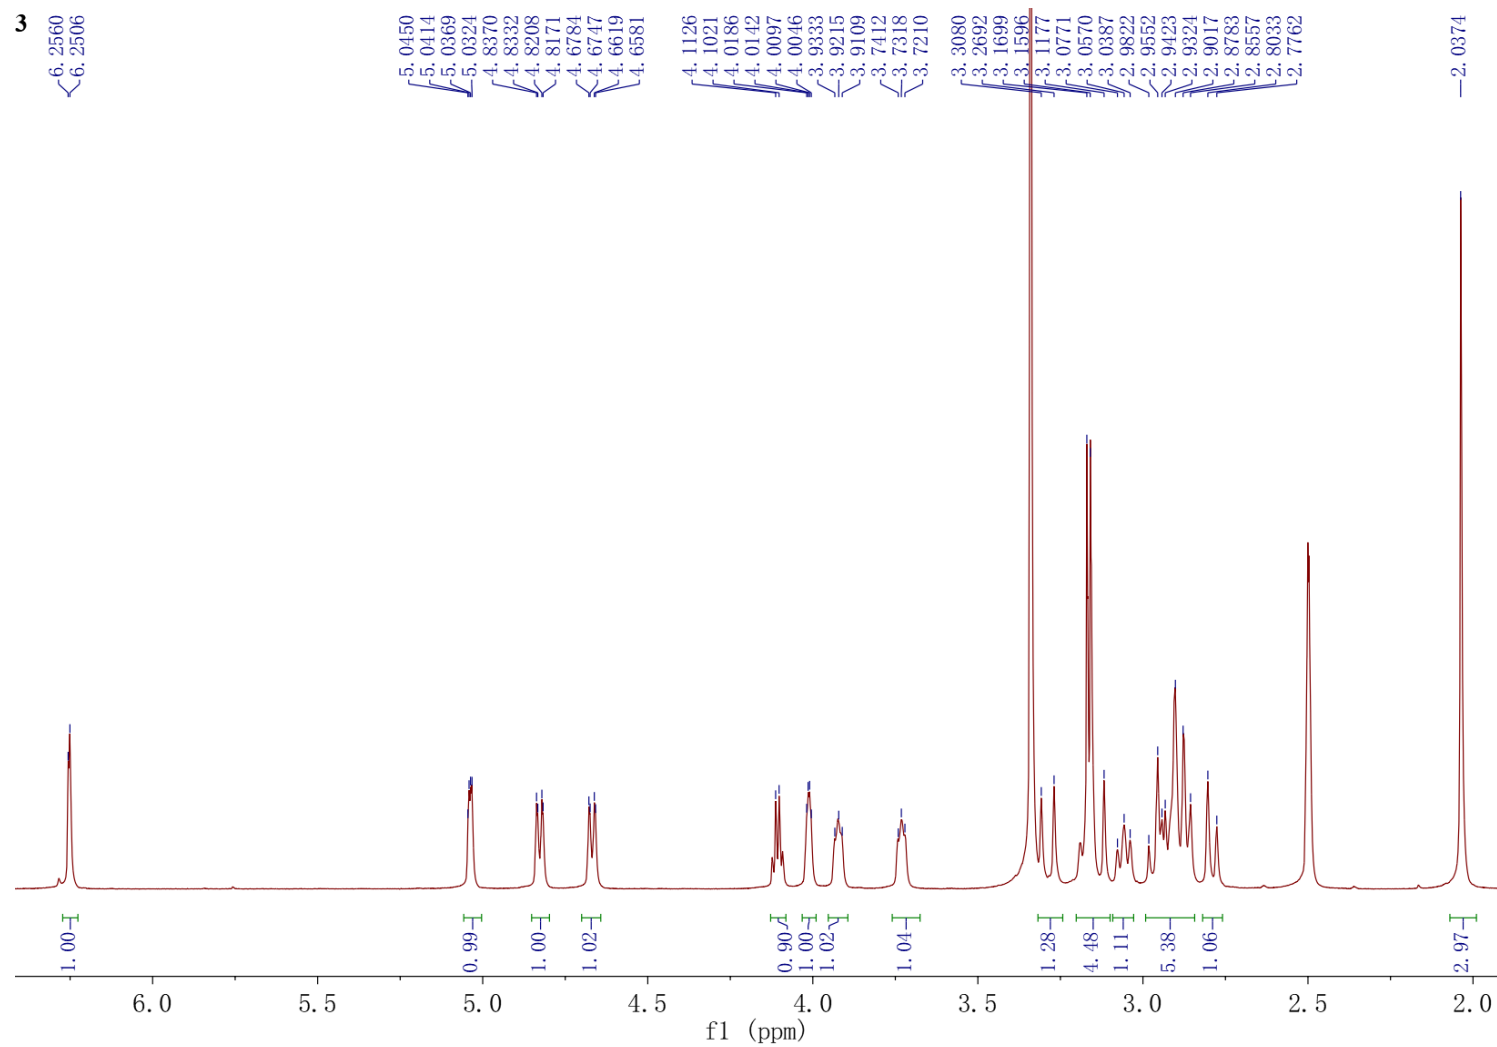

Figure S17.  $^{13}\text{C}$  NMR and DEPT (125 MHz,  $\text{DMSO}-d_6$ ) spectrum of compound **3**.

**3**

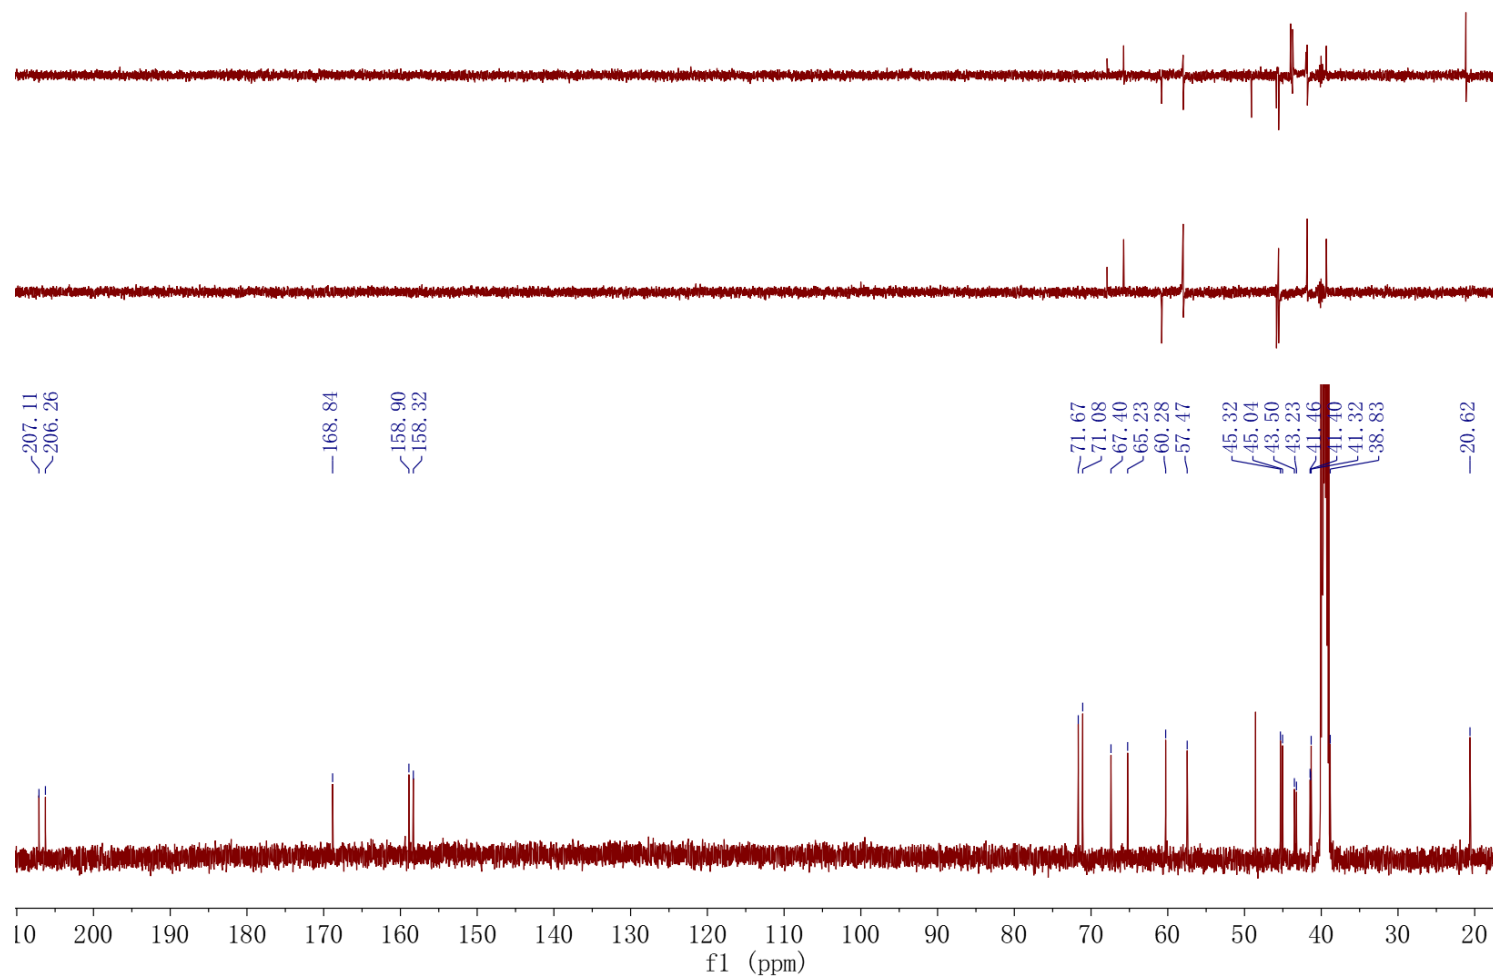

Figure S18. COSY spectrum of compound 3.

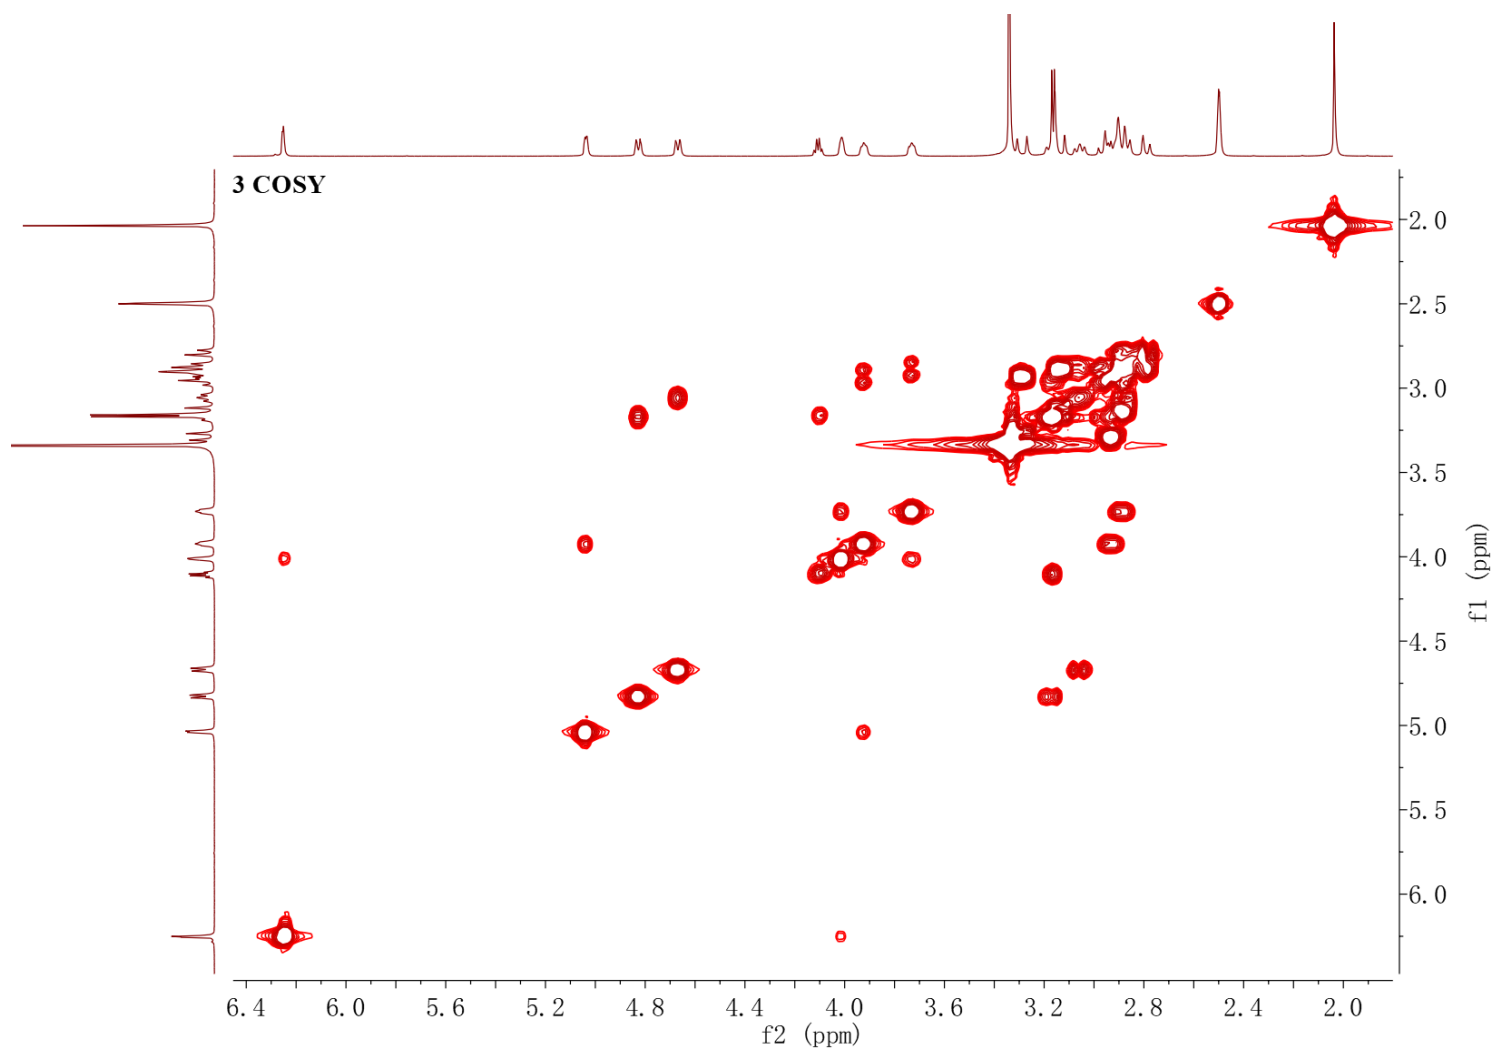

Figure S19. HMBC spectrum of compound 3.

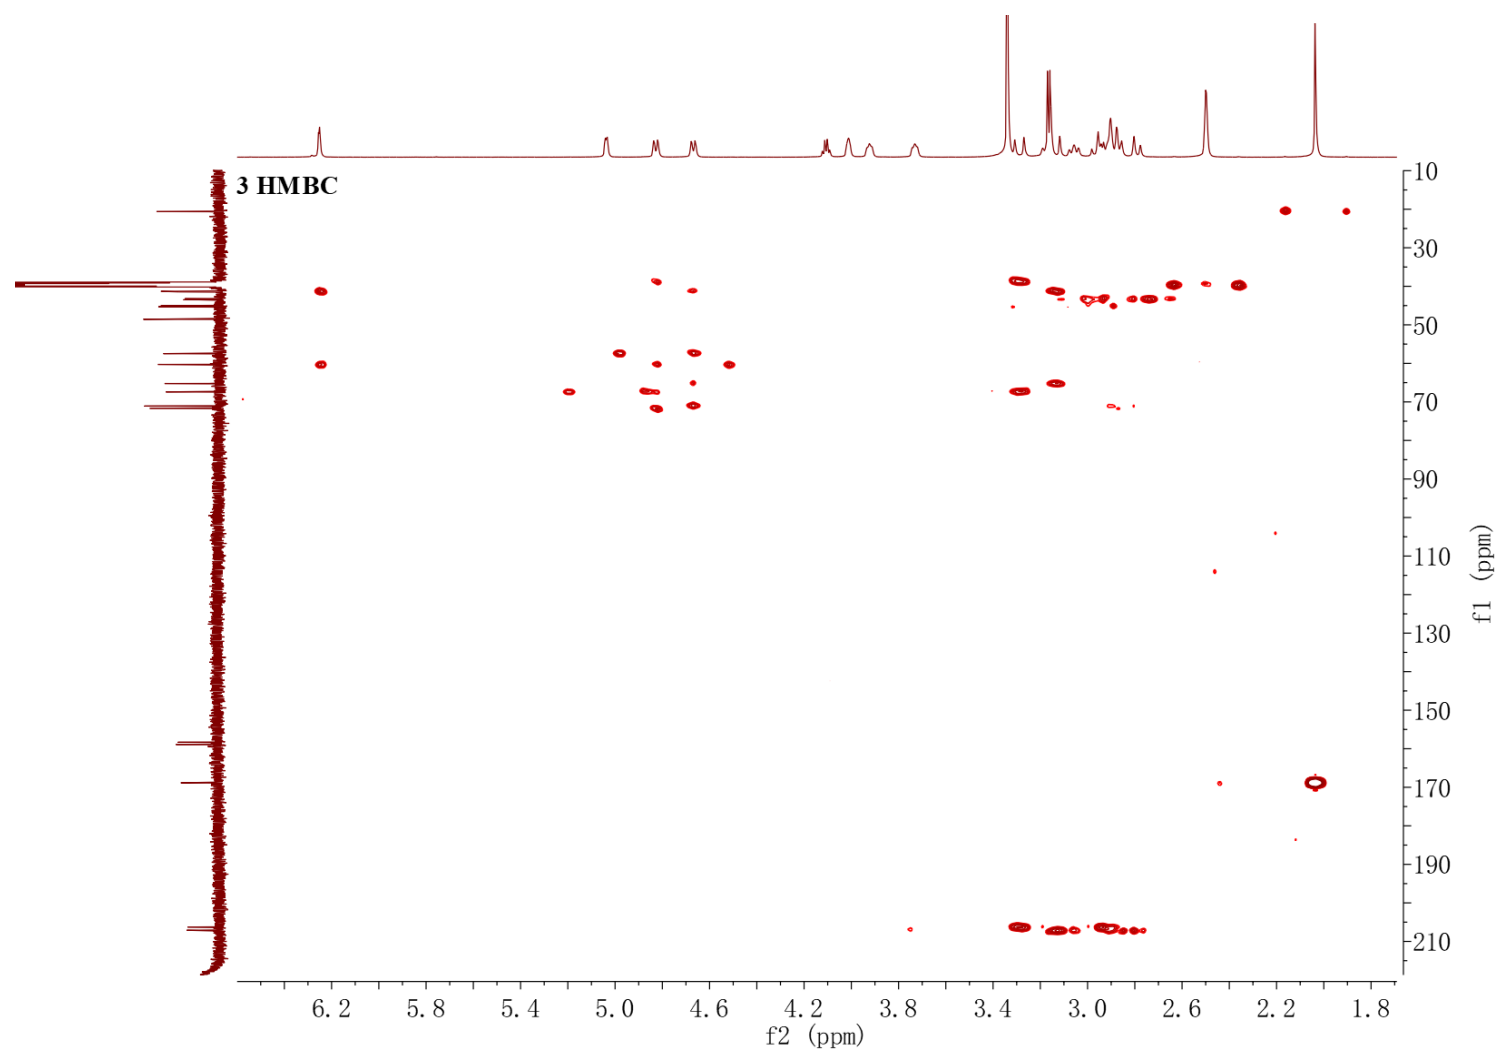

Figure S20. NOESY spectrum of compound 3.

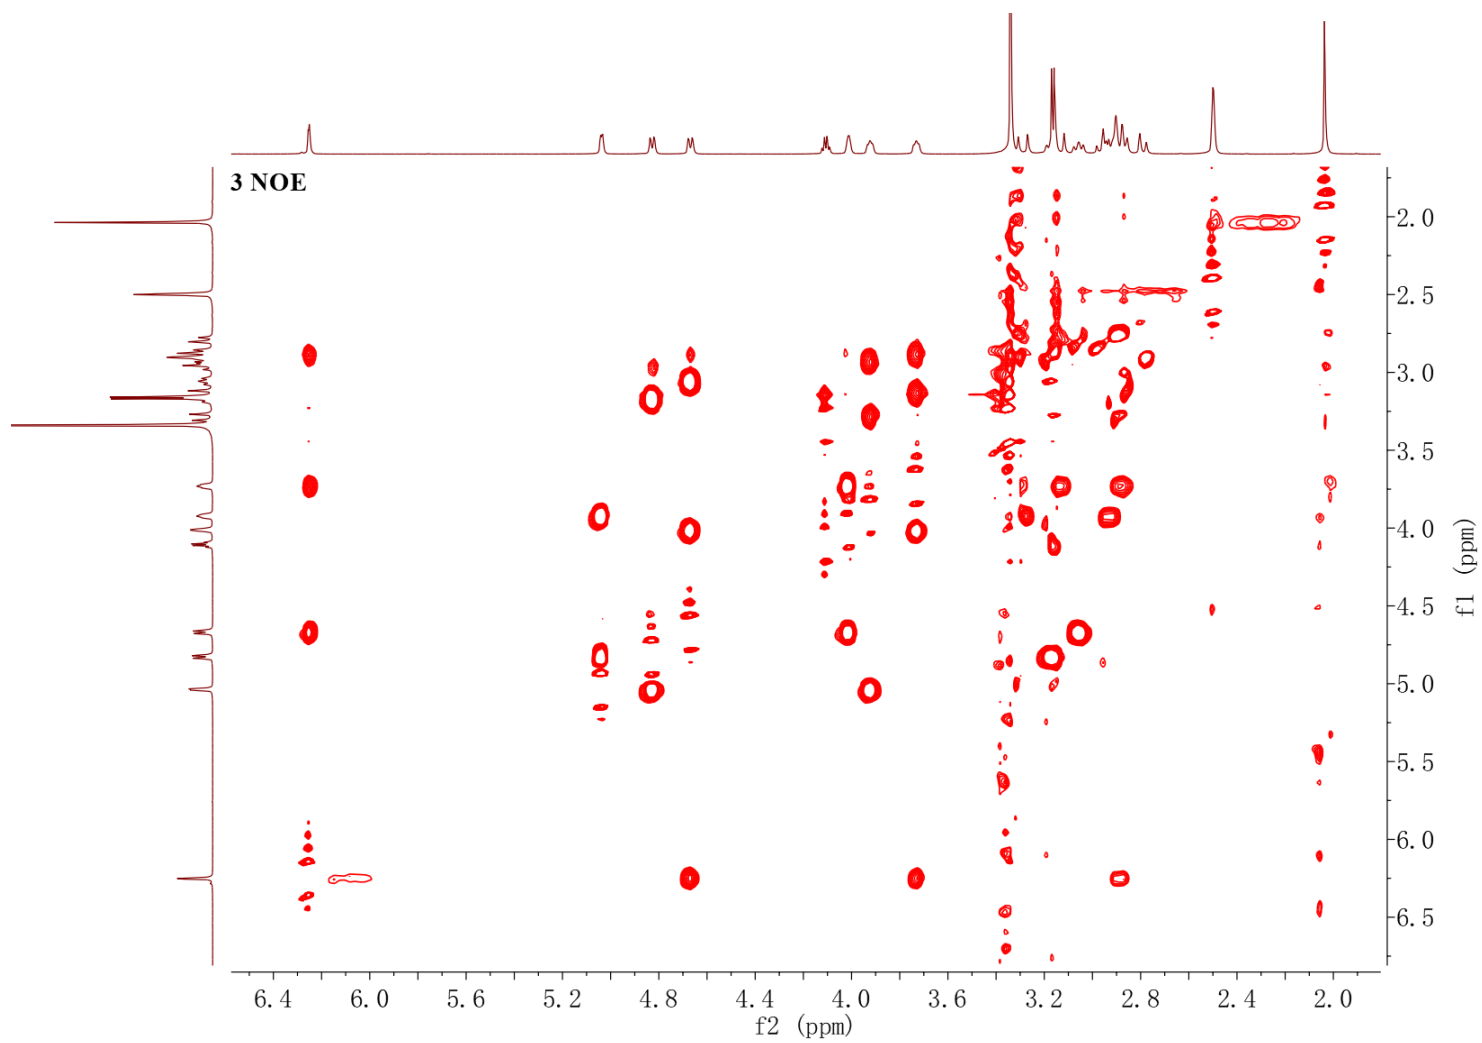

Figure S21. HR-ESI-MS of compound 3.

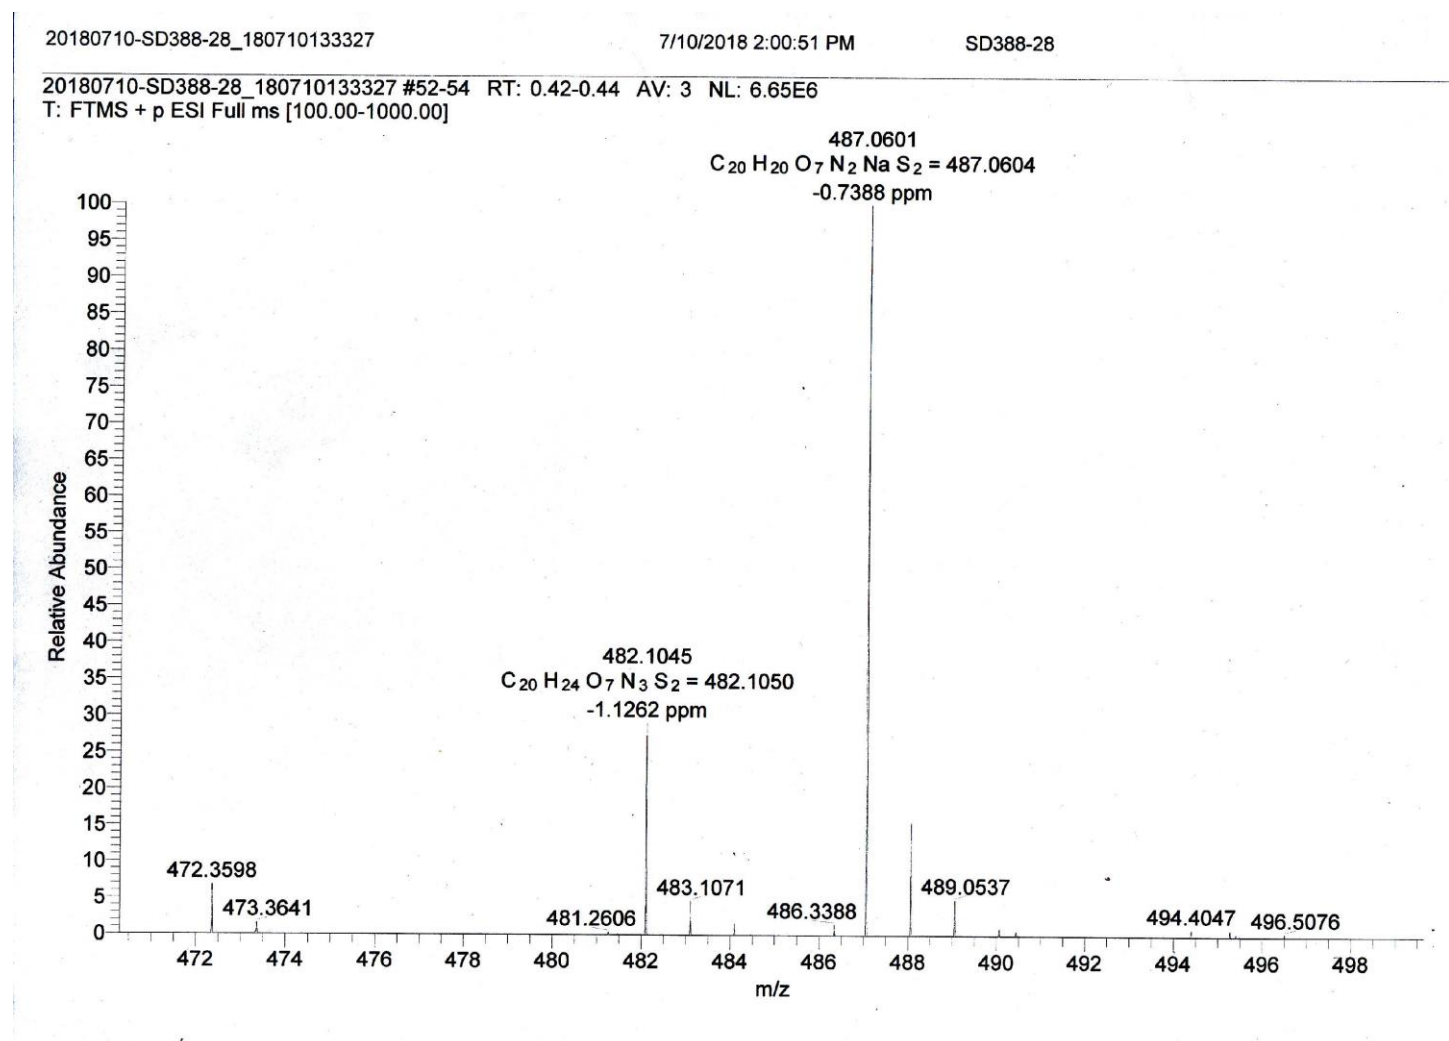

Figure S22. Crystal packing of compound **3** at 293(2) K;

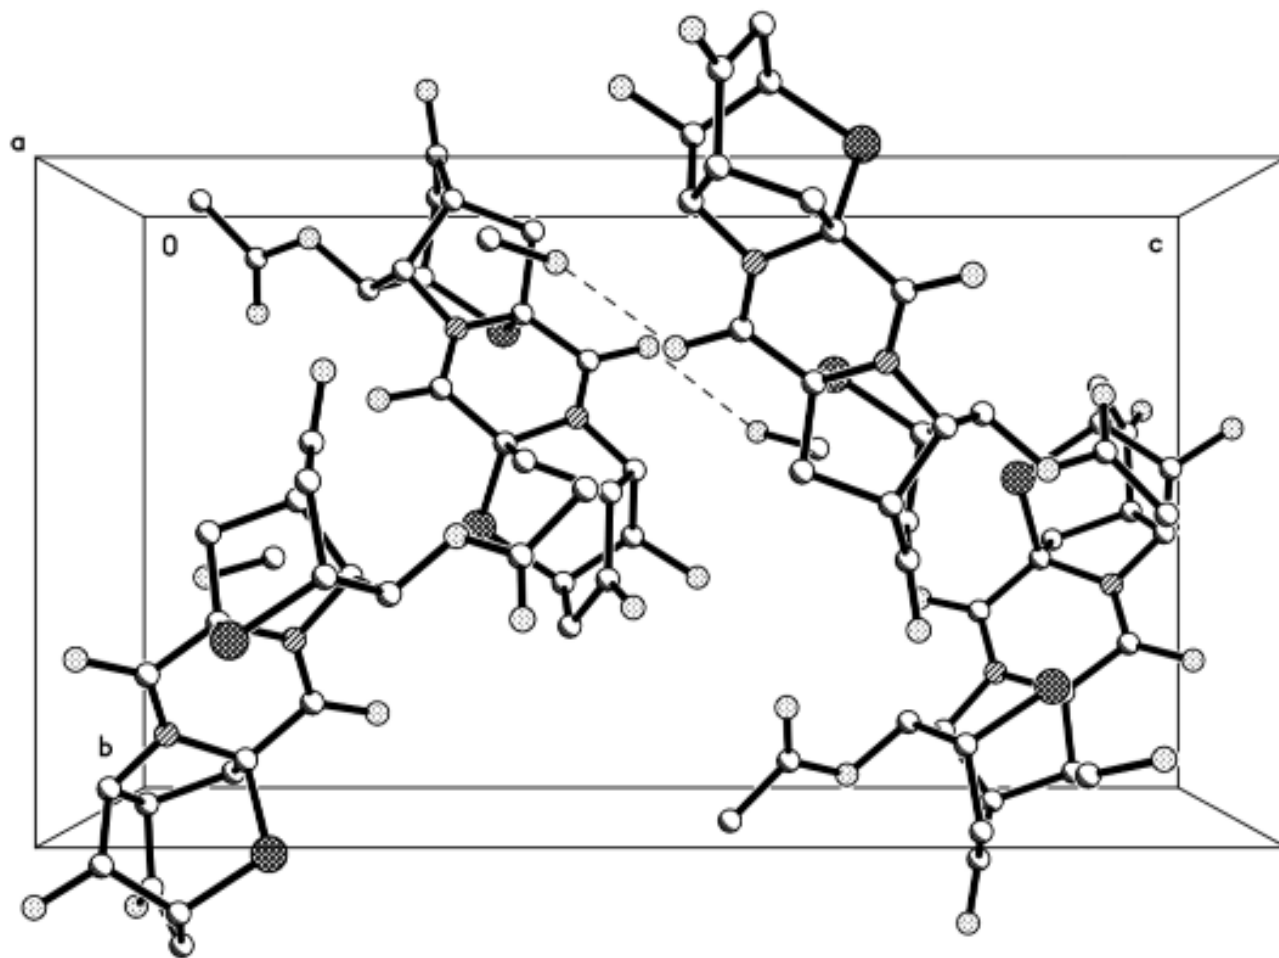

Figure S23.  $^1\text{H}$  NMR (500 MHz,  $\text{DMSO}-d_6$ ) spectrum of compound 4.

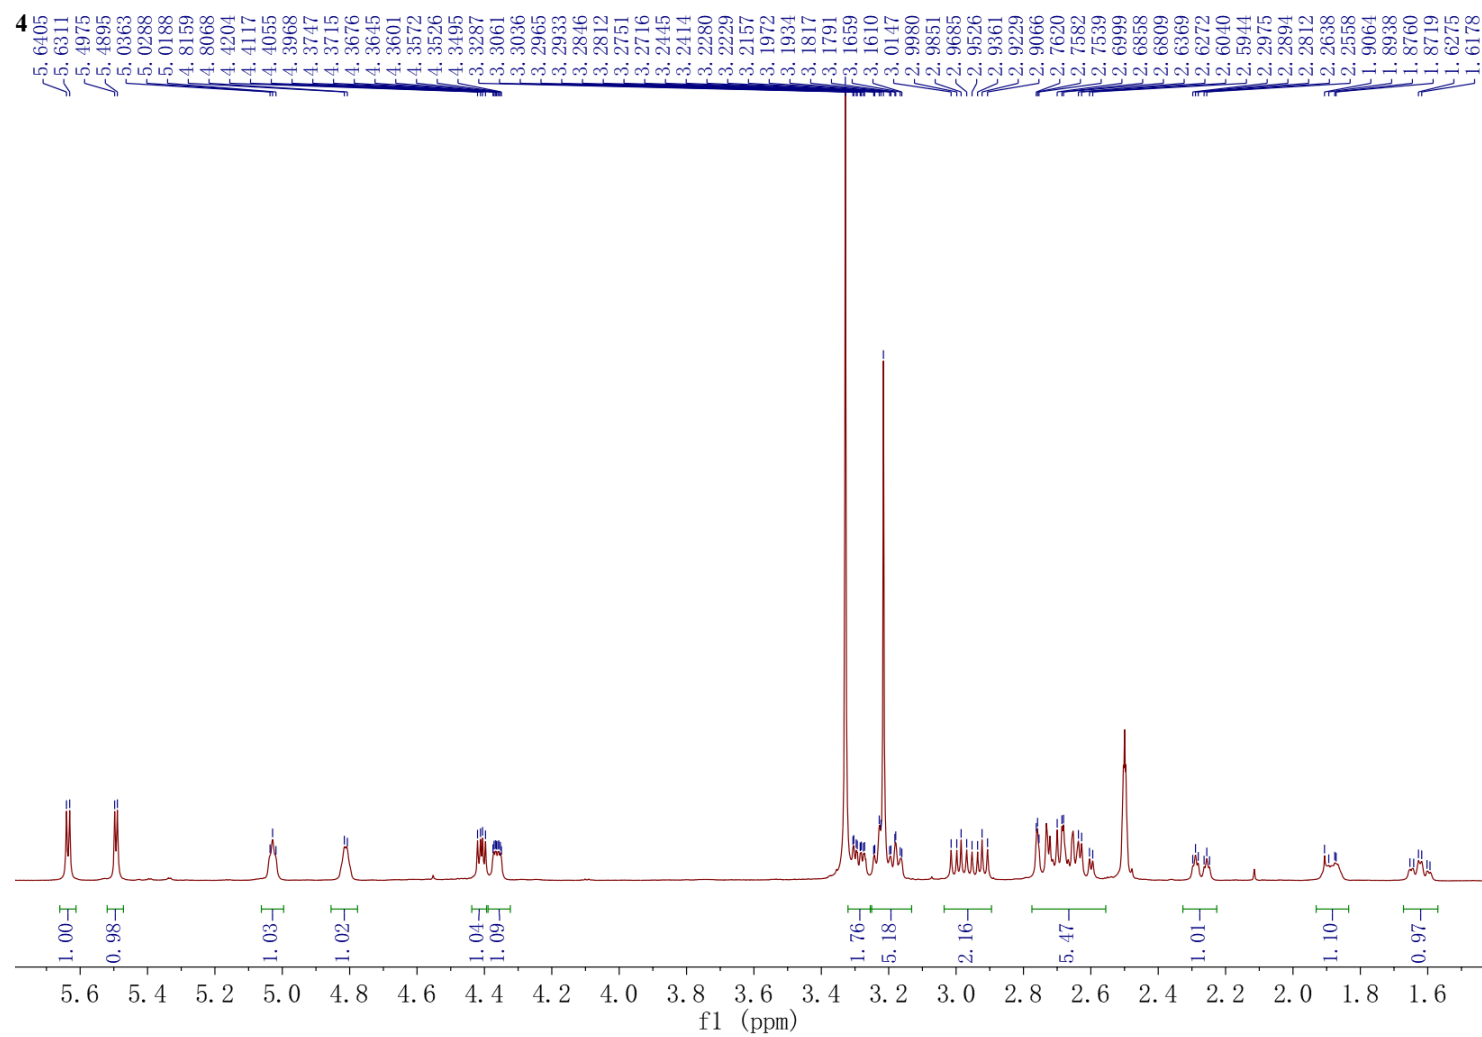

Figure S24.  $^{13}\text{C}$  NMR and DEPT (125 MHz,  $\text{DMSO}-d_6$ ) spectrum of compound 4.

4

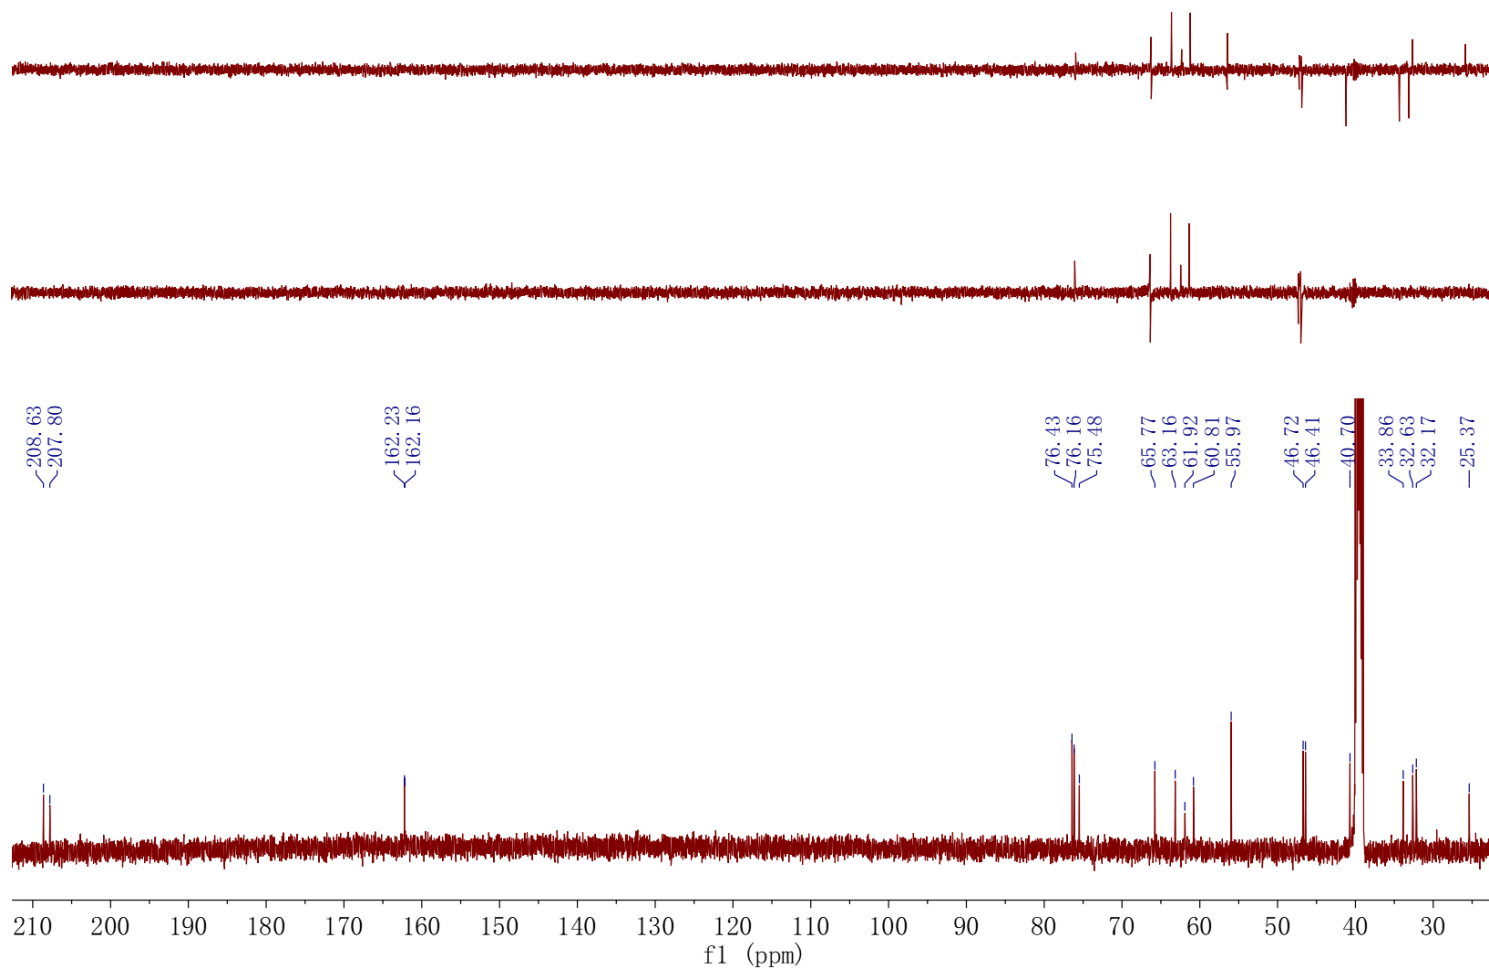

Figure S25. COSY spectrum of compound **4**.

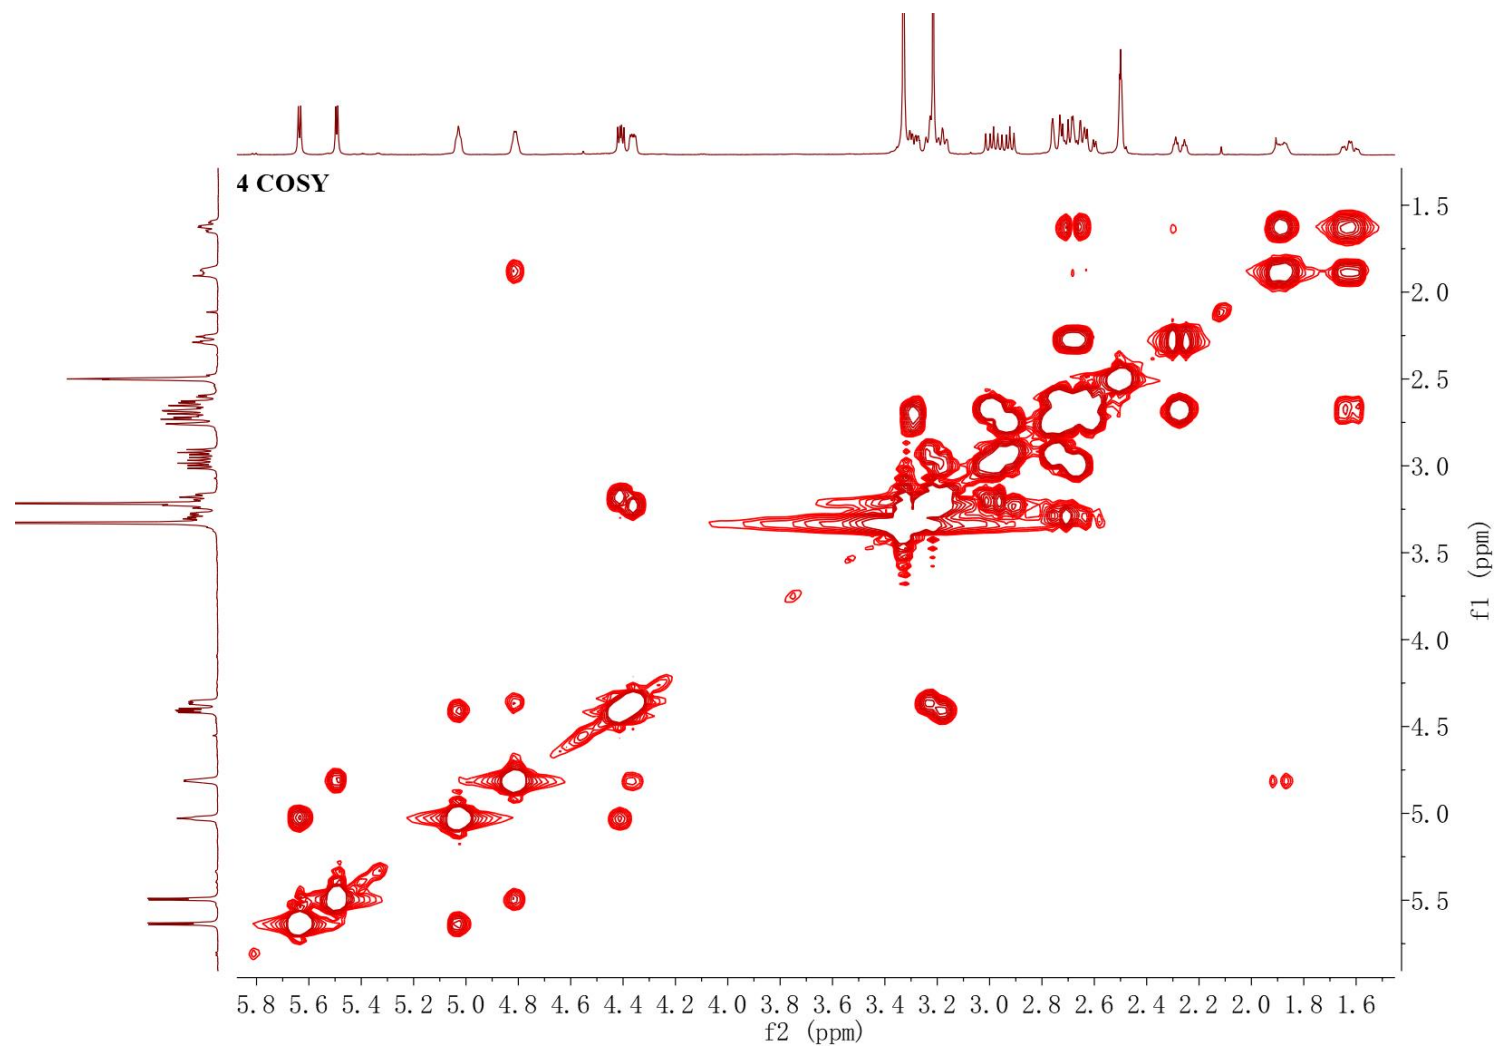

Figure S26. HSQC spectrum of compound 4.

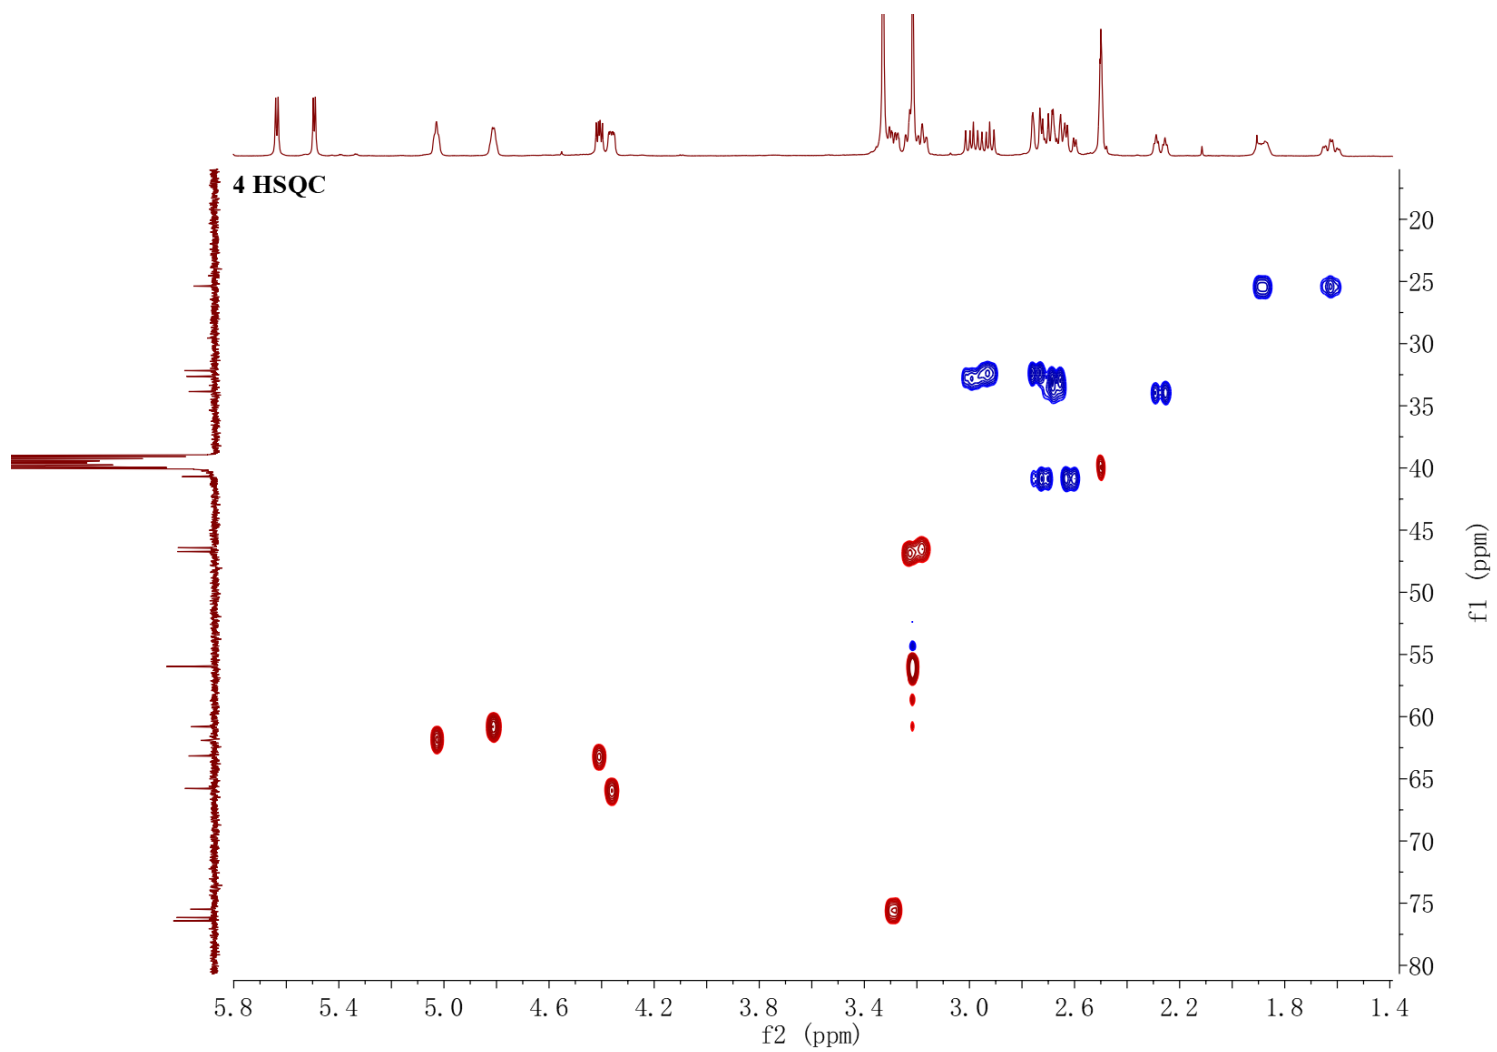

Figure S27. HMBC spectrum of compound **4**.

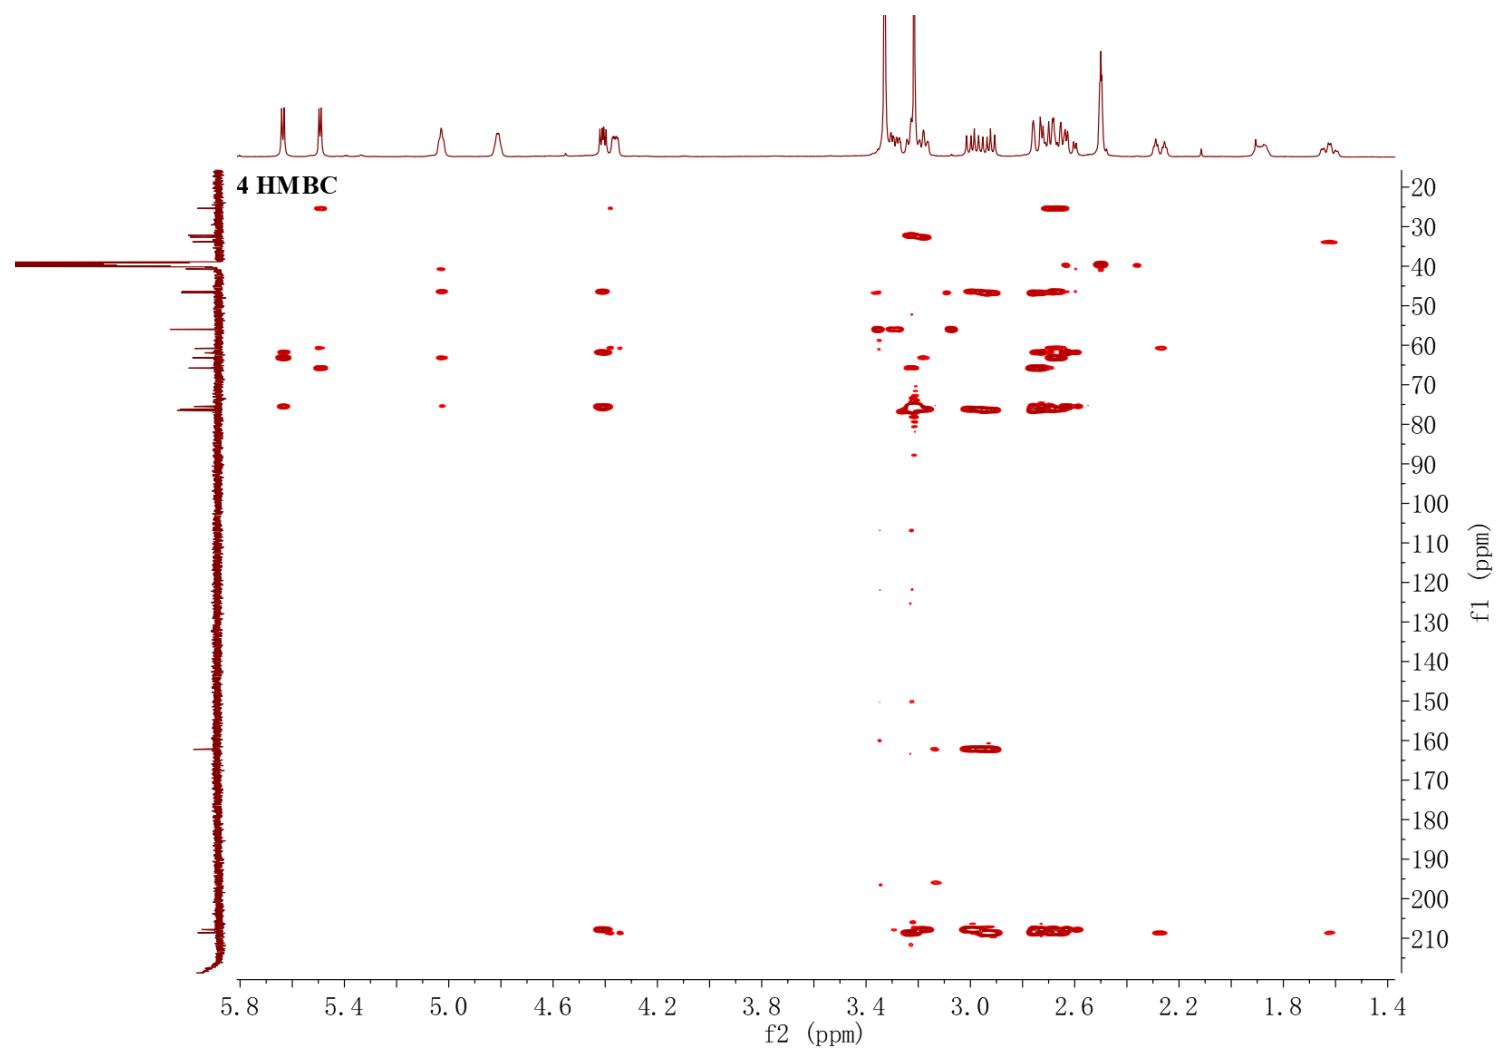

Figure S28. NOESY spectrum of compound 4.

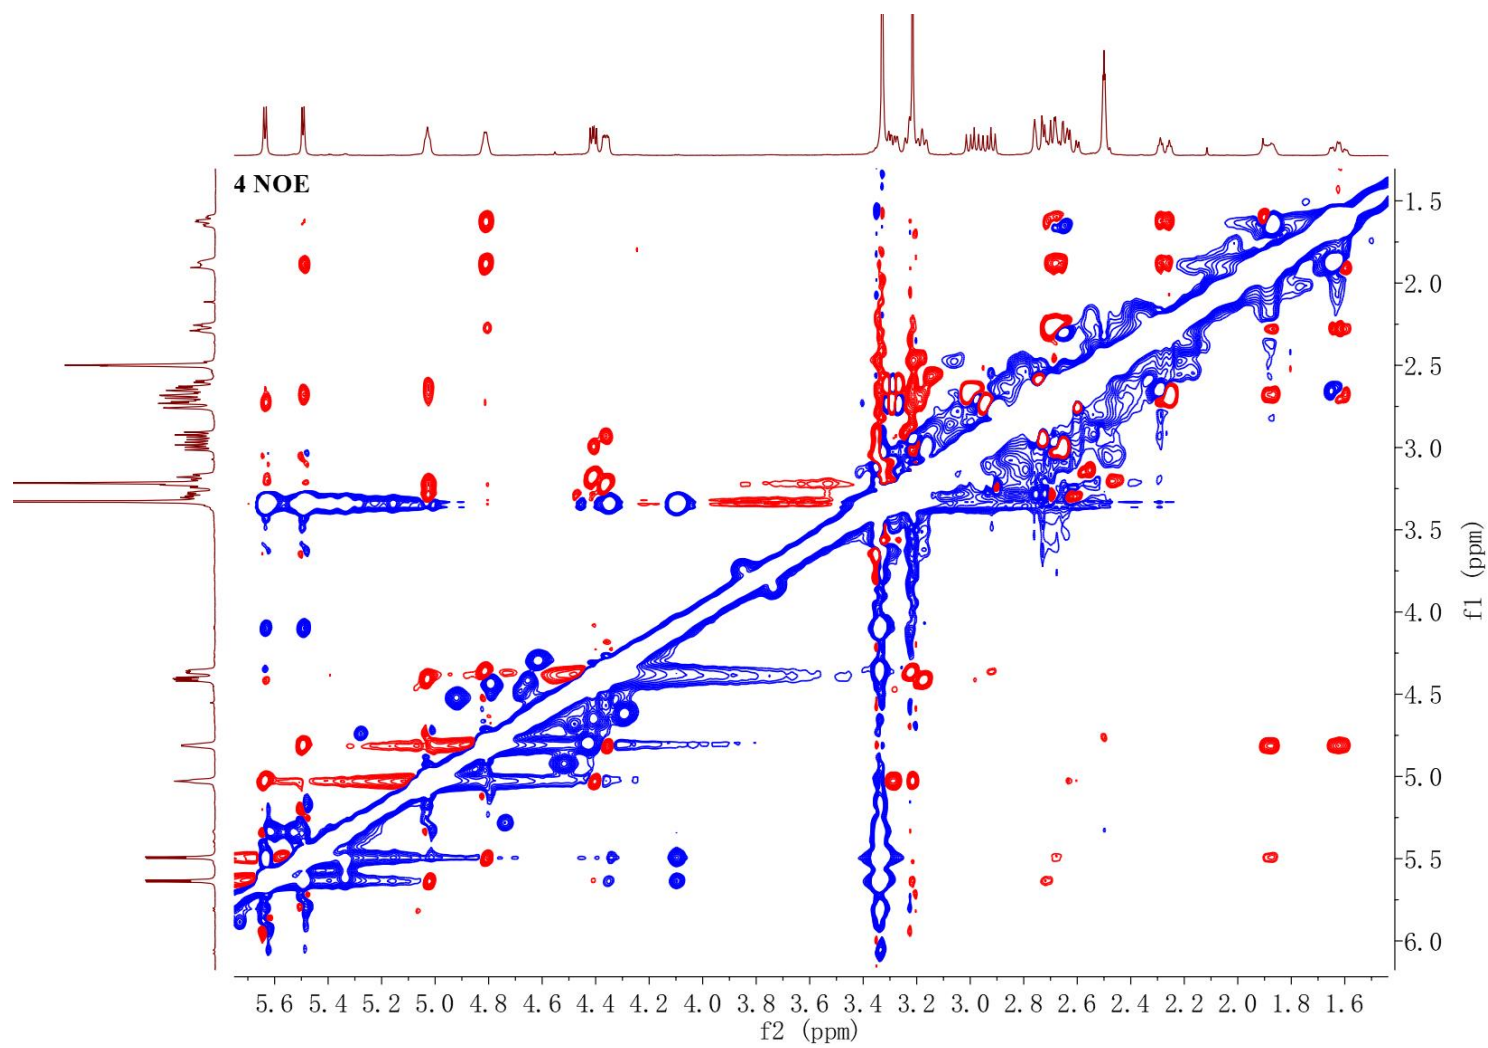

Figure S29. HR-ESI-MS of compound 4.

20180905-SD388-33\_180904143152

9/5/2018 9:42:10 AM

SD388-33

20180905-SD388-33\_180904143152 #80 RT: 0.65 AV: 1 NL: 5.90E5

T: FTMS + p ESI Full ms [100.00-1000.00]

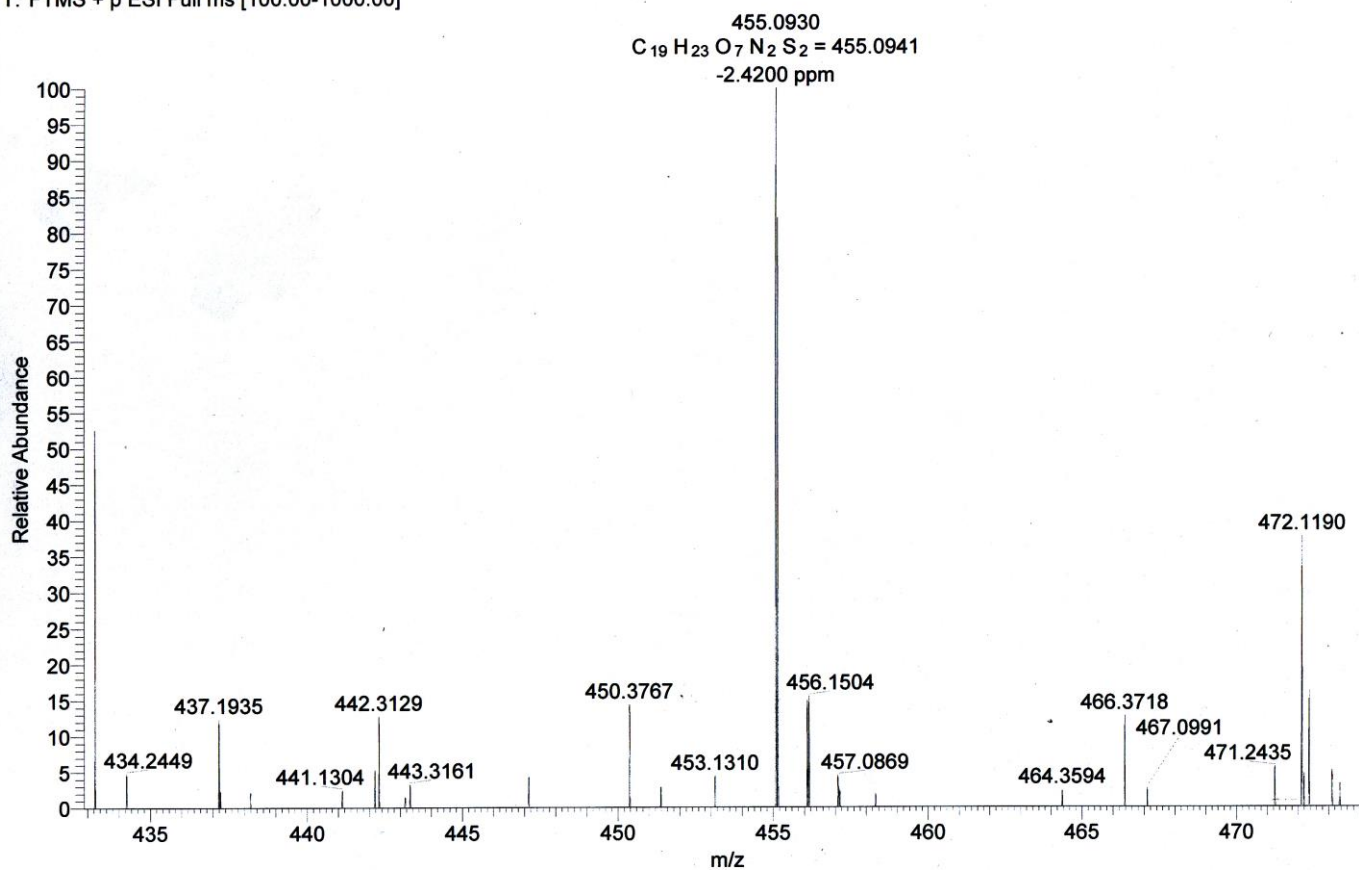

Figure S30. ECD spectrum of compound **4**.

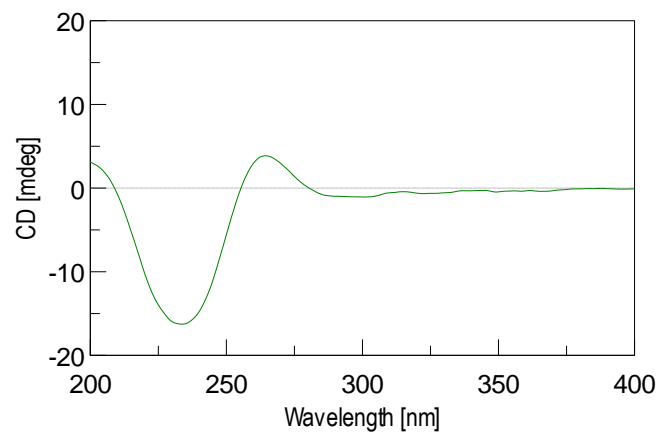

Figure S31.  $^1\text{H}$  NMR (500 MHz,  $\text{DMSO}-d_6$ ) spectrum of compound 5.

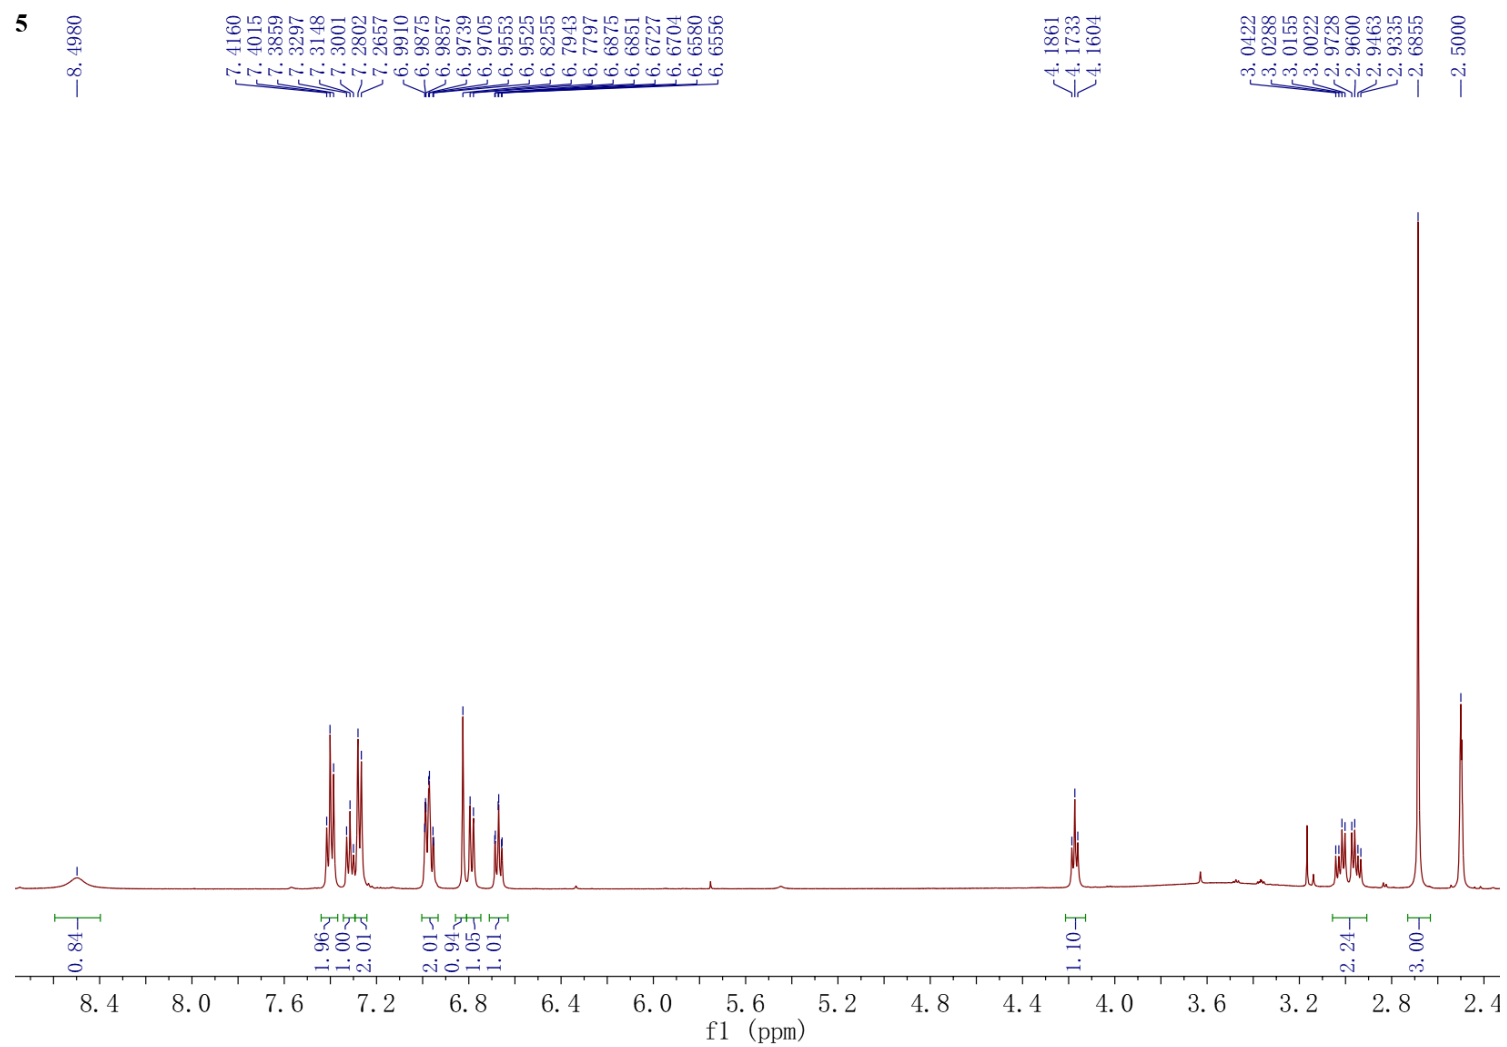

Figure S32.  $^{13}\text{C}$  NMR and DEPT (125 MHz,  $\text{DMSO}-d_6$ ) spectrum of compound 5.

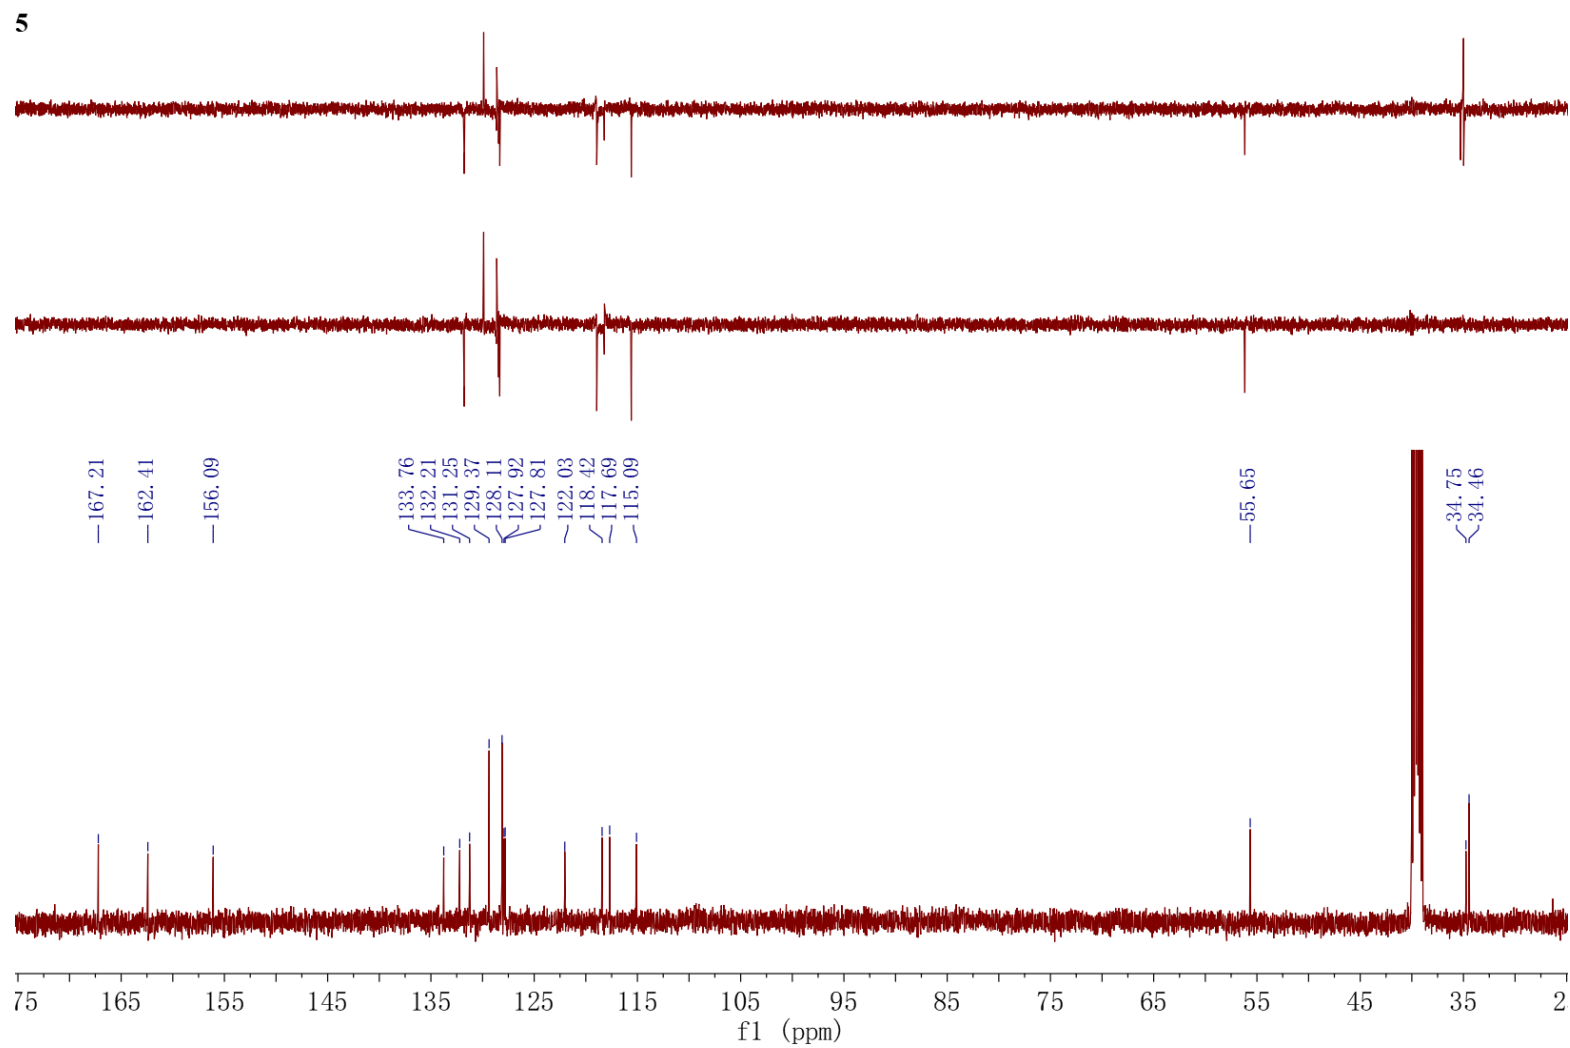

Figure S33. COSY spectrum of compound 5.

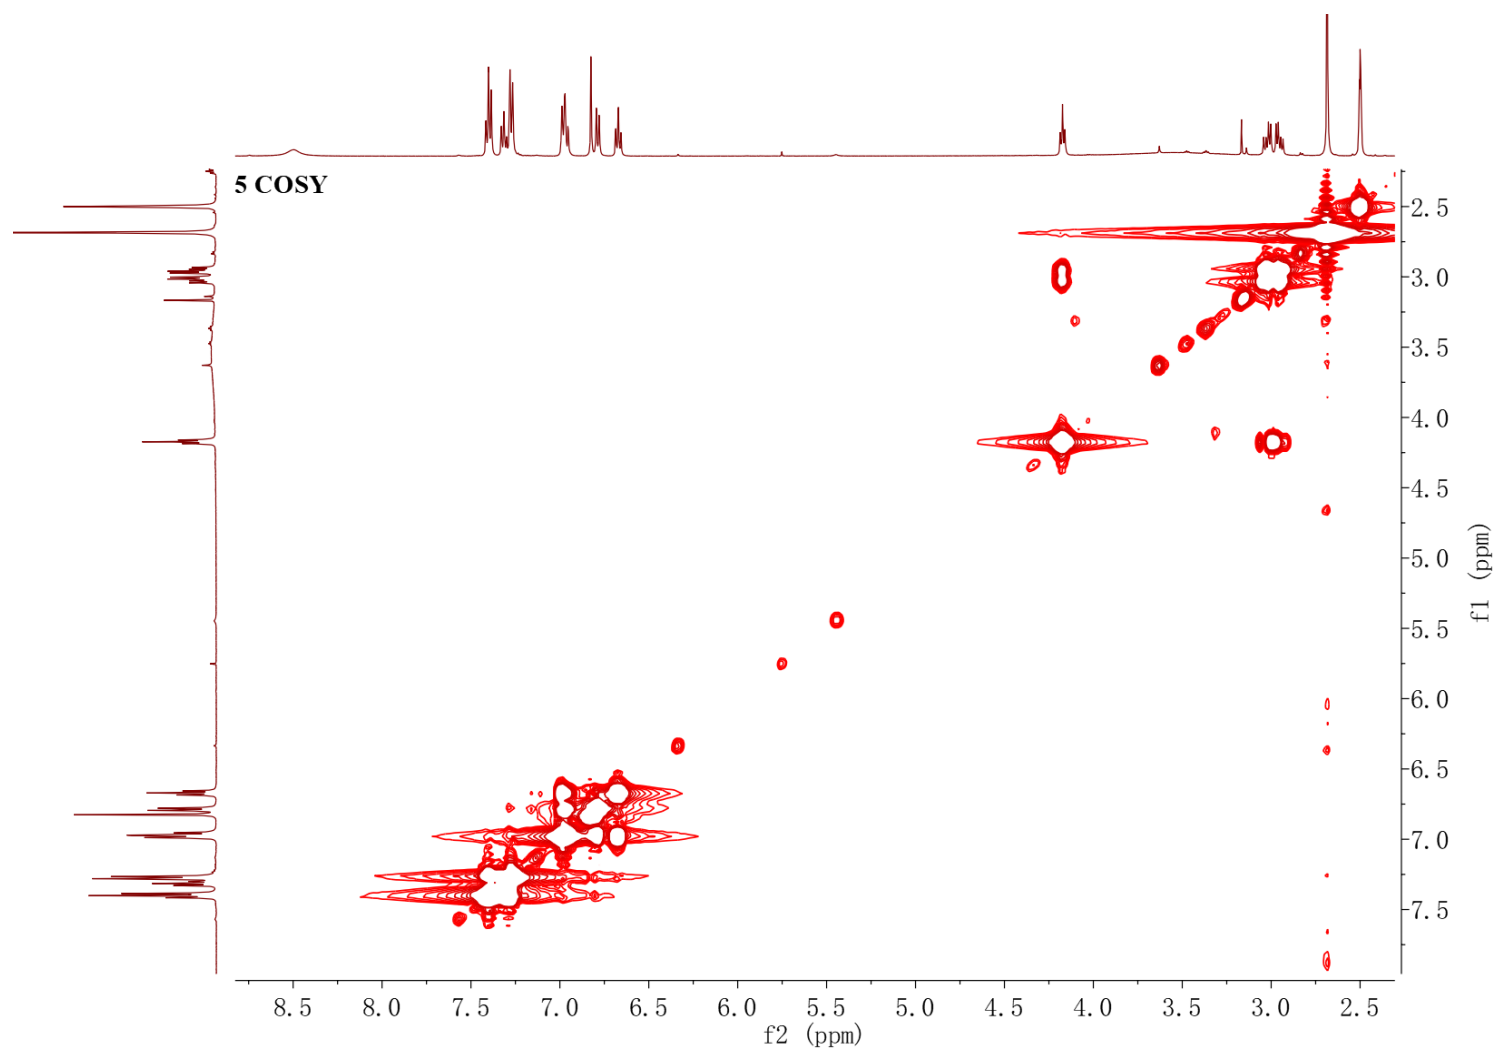

Figure S34. HMBC spectrum of compound 5.

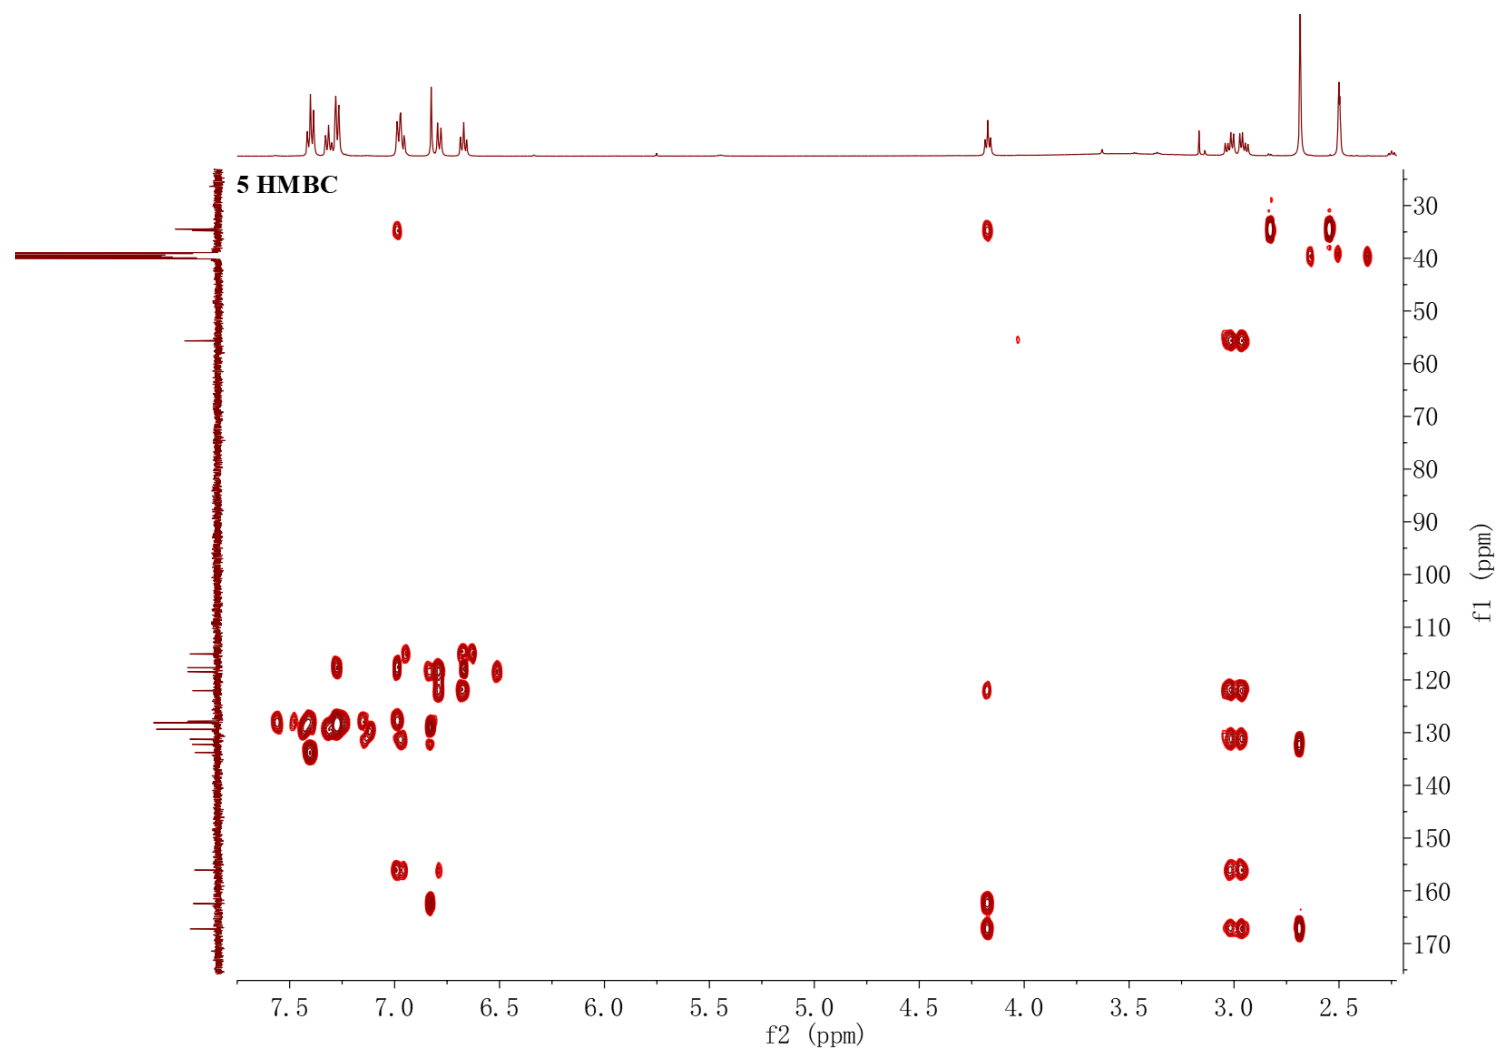

Figure S35. HR-ESI-MS of compound 5.

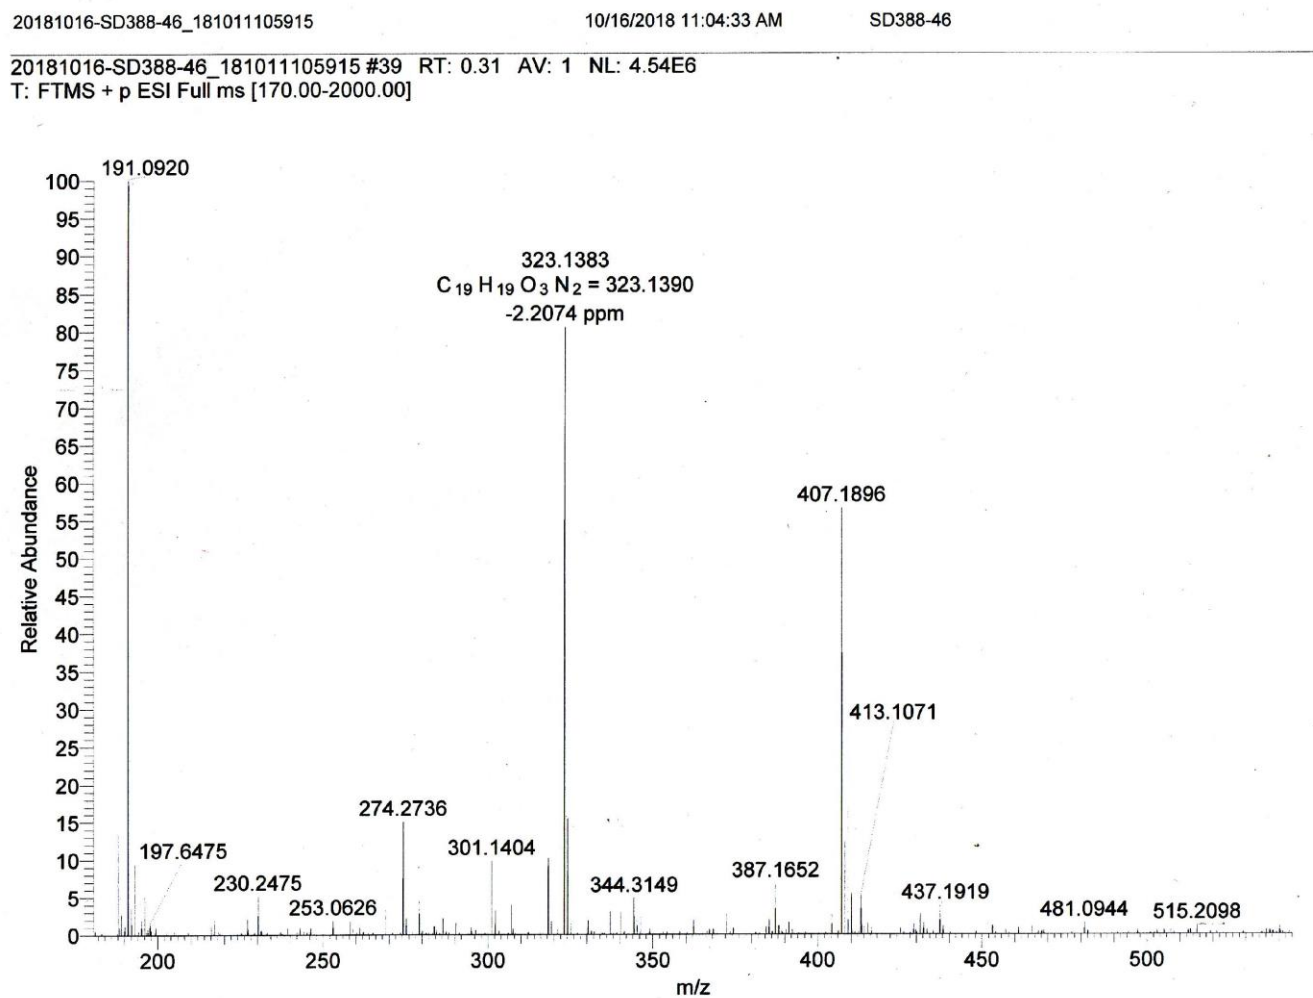

Figure S36. ECD spectrum of compound ( $\pm$ )-5.

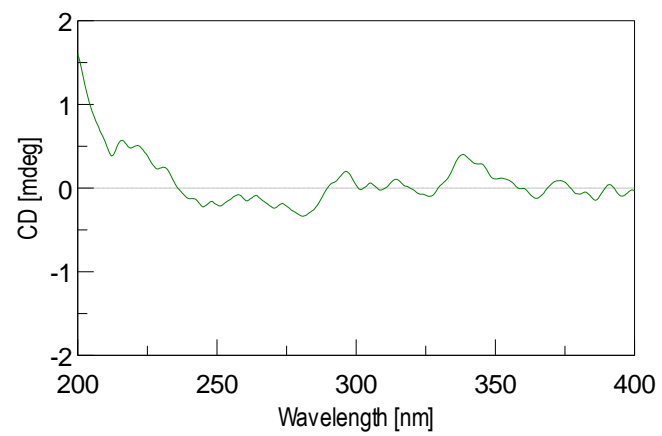

Figure S37. Chiral HPLC profile of compound ( $\pm$ )-5.

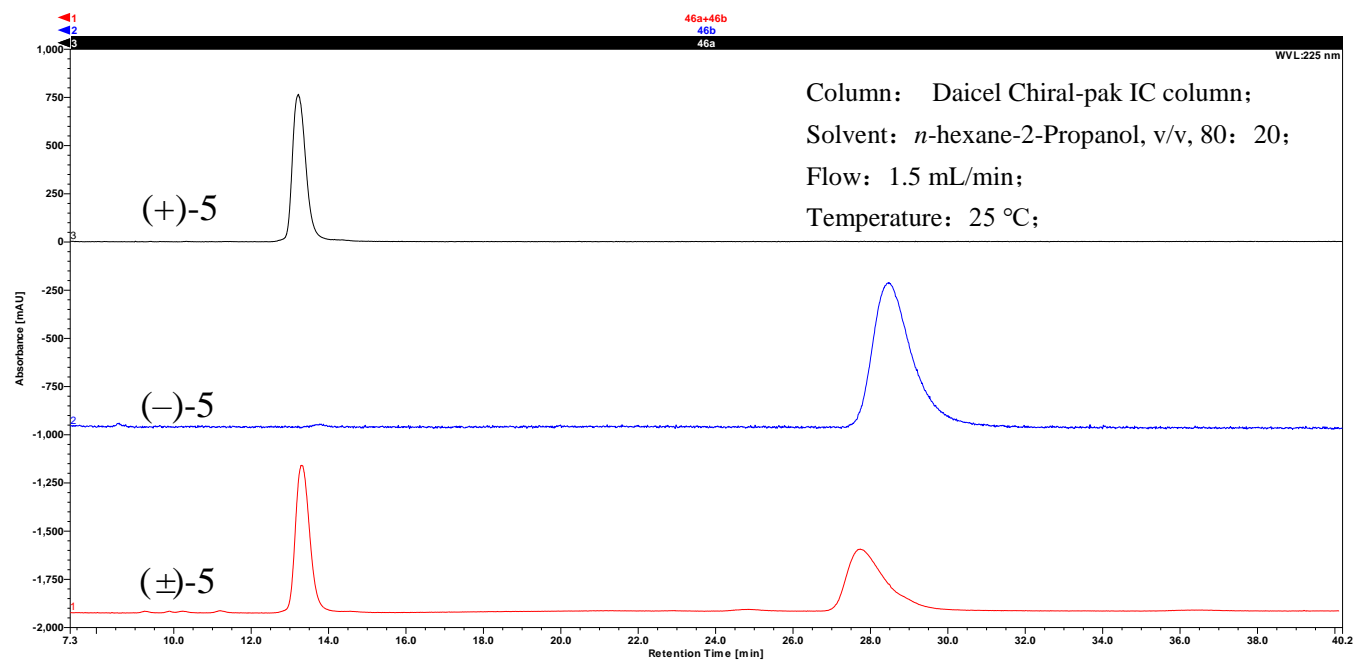

Figure S38. ECD spectrum of compound (+)-5.

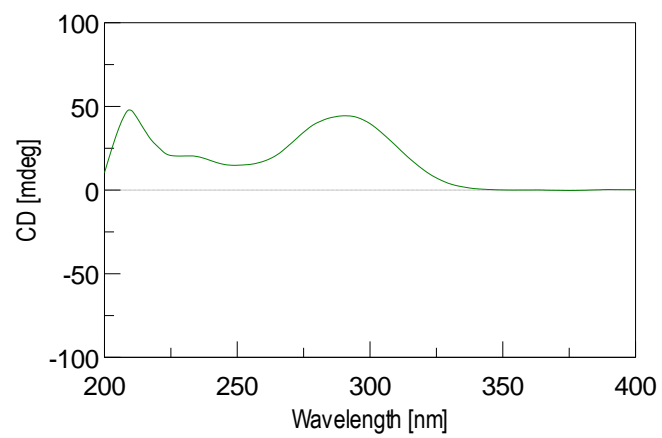

Figure S39. ECD spectrum of compound (-)-5.

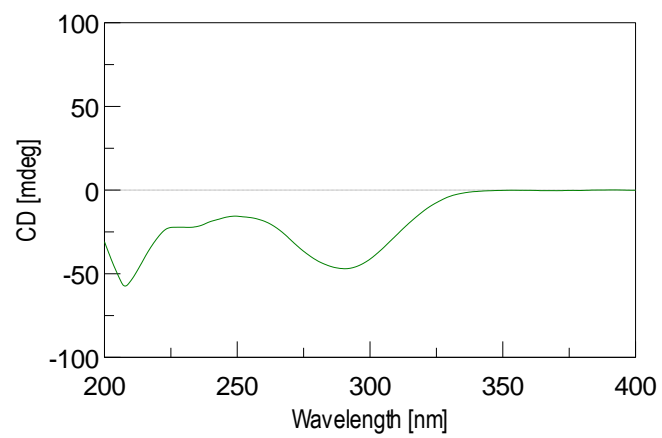

Supplement: Supplementary file 1 [file marinedrugs-18-00160-s001.pdf]
